1 **Initial HCV infection of adult hepatocytes triggers a temporally structured**  
2 **transcriptional program containing diverse pro- and anti-viral elements**

3  
4 Birthe Tegtmeyer<sup>1</sup>, Gabrielle Vieyres<sup>2</sup>, Daniel Todt<sup>3,4</sup>, Chris Lauber<sup>1</sup>, Corinne Ginkel<sup>1</sup>,  
5 Michael Engelmann<sup>3</sup>, Maike Herrmann<sup>5</sup>, Christian K. Pfaller<sup>5</sup>, Florian W. R. Vondran<sup>6</sup>,  
6 Ruth Broering<sup>7</sup>, Ehsan Vafadarnejad<sup>8</sup>, Antoine-Emmanuel Saliba<sup>8</sup>, Christina Puff<sup>9</sup>,  
7 Wolfgang Baumgärtner<sup>9</sup>, Csaba Miskey<sup>10</sup>, Zoltán Ivics<sup>10</sup>, Eike Steinmann<sup>3</sup>, Thomas  
8 Pietschmann<sup>1</sup>, Richard J. P. Brown<sup>5#</sup>

9  
10 <sup>1</sup>Institute of Experimental Virology, TWINCORE, Centre for Experimental and Clinical  
11 Infection Research; a joint venture between the Medical School Hannover (MHH) and  
12 the Helmholtz Centre for Infection Research (HZI), Hannover, Germany

13 <sup>2</sup>Heinrich Pette Institute, Leibniz Institute for Experimental Virology, Hamburg, Germany

14 <sup>3</sup>Department of Molecular and Medical Virology, Bochum, Germany

15 <sup>4</sup>European Virus Bioinformatics Center (EVBC), Jena, Germany

16 <sup>5</sup>Division of Veterinary Medicine, Paul Ehrlich Institute, Langen, Germany

17 <sup>6</sup>Department of General, Visceral and Transplant Surgery, Hannover Medical School,  
18 30625 Hannover, Germany; German Centre for Infection Research (DZIF), partner site  
19 Hannover-Braunschweig, Hannover, Germany

20 <sup>7</sup>Department of Gastroenterology and Hepatology, University Hospital Essen, University  
21 Duisburg-Essen, Essen, Germany

22 <sup>8</sup>Helmholtz Institute for RNA-based Infection Research (HIRI), Helmholtz-Center for  
23 Infection Research (HZI), Würzburg, Germany

24 <sup>9</sup>Department of Pathology, University of Veterinary Medicine Hannover, Hannover,  
25 Germany

26 <sup>10</sup>Division of Medical Biotechnology, Paul Ehrlich Institute, Langen, Germany

27

28 #Corresponding author

29 **Address of Correspondence:**

30 Dr. Richard J. P. Brown

31 Division of Veterinary Medicine

32 Paul-Ehrlich-Institut

33 Federal Institute for Vaccines and Biomedicines

34 Paul-Ehrlich-Str. 51-59

35 63225 Langen

36 Phone +49 6103 77 7441

37 Fax +49 6103 77 1254

38 E-Mail: [Richard.Brown@pei.de](mailto:Richard.Brown@pei.de)

39

40

41

42

43

44

45

46

47

48 **ABSTRACT**

49 Transcriptional profiling provides global snapshots of virus-mediated cellular  
50 reprogramming, which can simultaneously encompass pro- and antiviral components.  
51 To determine early transcriptional signatures associated with HCV infection of authentic  
52 target cells, we performed ex vivo infections of adult primary human hepatocytes (PHHs)  
53 from seven donors. Longitudinal sampling identified minimal gene dysregulation at six  
54 hours post infection (hpi). In contrast, at 72 hpi, massive increases in the breadth and  
55 magnitude of HCV-induced gene dysregulation were apparent, affecting gene classes  
56 associated with diverse biological processes. Comparison with HCV-induced  
57 transcriptional dysregulation in Huh-7.5 cells identified limited overlap between the two  
58 systems. Of note, in PHHs, HCV infection initiated broad upregulation of canonical  
59 interferon (IFN)-mediated defense programs, limiting viral RNA replication and  
60 abrogating virion release. We further find that constitutive expression of *IRF1* in PHHs  
61 maintains a steady-state antiviral program in the absence of infection, which can  
62 additionally reduce HCV RNA translation and replication. We also detected infection-  
63 induced downregulation of ~90 genes encoding components of the EIF2 translation  
64 initiation complex and ribosomal subunits in PHHs, consistent with a signature of  
65 translational shutoff. As HCV polyprotein translation occurs independently of the EIF2  
66 complex, this process is likely pro-viral: only translation initiation of host transcripts is  
67 arrested. The combination of antiviral intrinsic and inducible immunity, balanced against  
68 pro-viral programs, including translational arrest, maintains HCV replication at a low-  
69 level in PHHs. This may ultimately keep HCV under the radar of extra-hepatocyte  
70 immune surveillance while initial infection is established, promoting tolerance, preventing  
71 clearance and facilitating progression to chronicity.

72 **IMPORTANCE**

73 Acute HCV infections are often asymptomatic and therefore frequently undiagnosed. We  
74 endeavored to recreate this understudied phase of HCV infection using explanted PHHs  
75 and monitored host responses to initial infection. We detected temporally distinct virus-  
76 induced perturbations in the transcriptional landscape, which were initially narrow but  
77 massively amplified in breadth and magnitude over time. At 72 hpi, we detected  
78 dysregulation of diverse gene programs, concurrently promoting both virus clearance  
79 and virus persistence. On the one hand, baseline expression of *IRF1* combined with  
80 infection-induced upregulation of IFN-mediated effector genes suppresses virus  
81 propagation. On the other, we detect transcriptional signatures of host translational  
82 inhibition, which likely reduces processing of IFN-regulated gene transcripts and  
83 facilitates virus survival. Together, our data provide important insights into constitutive  
84 and virus-induced transcriptional programs in PHHs, and identifies simultaneous  
85 antagonistic dysregulation of pro-and anti-viral programs which may facilitate host  
86 tolerance and promote viral persistence.

87 **KEY WORDS**

88 Hepatitis C virus (HCV), RNA-seq, primary human hepatocytes, IFN regulatory factor 1  
89 (*IRF1*), IFN signaling, EIF2 signaling, translational shut-off

90 **RUNNING TITLE**

91 HCV transcriptional reprogramming of human hepatocytes

92 **INTRODUCTION**

93 Despite development of effective antiviral therapies, hepatitis C virus (HCV)  
94 remains a global health burden and still chronically infects around 71 million people  
95 worldwide. HCV is a positive-stranded RNA virus of the *Flaviviridae* family with a tropism

96 restricted to human hepatocytes (1). The development of cell culture systems has  
97 yielded insights into HCV-host interactions. For instance, a lipid metabolic  
98 reprogramming favorable to the constitution of the viral replication organelle (2) and  
99 stress responses (3) were reported upon HCV infection. These dysregulations facilitate  
100 viral propagation but also the development of pathogenesis in chronic infection,  
101 including liver steatosis (4). Balanced against this, HCV infection elicits a classical innate  
102 immune response that obeys rules that are conserved across viruses (5). Virus infection  
103 is sensed via diverse pattern recognition receptors (PRRs) which trigger signaling  
104 cascades involving the nuclear translocation of IFN regulatory factors (IRFs) and NF- $\kappa$ B  
105 (nuclear factor- $\kappa$ B). These transcription factors activate the expression of target genes,  
106 including IFNs, which in turn activate the transcription of a panel of IFN-regulated genes  
107 (IRGs) in a paracrine and autocrine manner (6). Many of these IRGs have known  
108 antiviral effects (7). Importantly, these host protective responses are dampened by the  
109 virus, for example by the viral protease NS3-4A, which cleaves several key molecules in  
110 the IFN induction pathway, including the adaptor MAVS (5).

111 Many of these changes, whether metabolic reprogramming to facilitate viral  
112 replication or defense reactions, are accompanied or caused by transcriptional  
113 alterations of the infected cell (8, 9). Transcriptome-wide studies of HCV infection mostly  
114 focused so far on cell lines, in particular on the Huh-7.5 hepatoma cell line (10), which  
115 represents a robust *in vitro* infection model (e.g. (8, 9)). Transcriptional profiling of liver  
116 biopsies from chronically infected patients were also performed (11). Previous studies in  
117 primary human hepatocytes (PHHs) were based on RT-qPCR or microarrays and  
118 restricted to specific gene subsets, in particular focusing on innate immunity (12–14).  
119 Responses to HCV infection in infected human hepatocytes at near-single cell resolution

120 were described. However these cells were derived from fetal liver cells rather than  
121 directly explanted from an adult liver (15) and have an immature phenotype (16).  
122 Additionally, the initial phase of infection directly preceding infection was not captured.

123 In this report, we used RNA-seq (17) to analyze the host transcriptional landscape  
124 directly after HCV infection of adult PHHs. Infection of human adult hepatocytes plated  
125 from liver resections of HCV-negative patients opens the unique possibility to study early  
126 time points directly after infection of natural HCV target cells, without contamination from  
127 other liver cell types (18) which could blur transcriptional signals. We compared the  
128 responses at 6 hpi and 72 hpi in order to reflect the spatial transitioning of viral  
129 replication complexes from ribosomes (19) to endoplasmic reticulum (20). In parallel, we  
130 also performed transcriptional profiling of highly permissive Huh-7.5 cells, which are  
131 widely used to propagate HCV *in vitro*, and directly compare HCV-induced gene  
132 dysregulation in the two systems for the first time.

## 133 RESULTS

134 **Experimental design and data visualization.** Explanted adult PHHs from seven  
135 donors (D1-7) were plated and checked for viability prior to infection experiments. PHHs  
136 were incubated with conditioned medium (CM) or infected with replication competent  
137 HCV (strain Jc1). Additionally, we inoculated PHHs with UV-inactivated HCV where  
138 sufficient viable patient material was available (HCV<sup>UV</sup>: D4-7). Cellular RNAs were  
139 isolated at two early time points (6 hpi and 72 hpi) to enable monitoring of global  
140 hepatocyte transcriptional changes by RNA-seq and quantification of HCV RNA (Fig  
141 1A). Infection experiments in Huh-7.5 cells were also performed in parallel.

142 After mapping RNA-seq data to the hg38 genome scaffold, raw count data were  
143 normalized (reads per kilobase of transcript per million mapped reads: RPKM) to allow

144 comparison of global gene expression profiles within and between experiments. Mean  
145 RPKM values for all expressed genes were plotted for CM-treated PHHs versus HCV or  
146 HCV<sup>UV</sup> infected PHHs, and correlation analyses performed at both 6 hpi and 72 hpi (Fig  
147 1B). These analyses revealed all comparisons were highly significant ( $P < 0.0001$ ) with  
148 Pearson's  $r$  correlation close to 1, indicating the majority of hepatocyte mRNAs are  
149 expressed at steady-state and not significantly dysregulated upon HCV infection. Of  
150 note, Pearson's  $r$  was lowest at 72 hpi with replication competent HCV (0.9566),  
151 indicating greater numbers of dysregulated hepatocyte genes under these conditions  
152 (Fig 1B).

153 Principle component analyses (PCA), performed separately on samples from  
154 individual donors, revealed HCV-infected PHHs were clearly separated from CM-treated  
155 and HCV<sup>UV</sup> infected cells at both time points (see example plot from D4, Fig 1C). In  
156 addition, for all donors, temporally distinct clusters at 6 and 72 hours were apparent,  
157 validating our approach of using time-matched infected and uninfected PHHs to avoid  
158 mixing of signals associated with HCV infection versus gradual hepatocyte de-  
159 differentiation upon plating.

160 **HCV infection activates antiviral defenses in PHHs but not Huh-7.5 cells.** Transcript  
161 abundance of a panel of selected control genes were compared in PHHs and highly  
162 permissive Huh-7.5 cells (21), both with and without HCV infection. Comparable  
163 abundant expression of hepatocyte marker *ALB* and transcripts encoding HCV entry and  
164 replication co-factors were detected in both PHHs and Huh-7.5 cells. Their expression  
165 remained stable across the experimental time-course suggesting no reduction in HCV  
166 permissiveness and no modulation of expression due to infection (Fig 1D). As expected,  
167 expression of lung-specific transcripts was either minimal or absent.

168 Baseline expression of a panel of IFN regulated genes (IRGs) was detectable in  
169 PHHs, which was not further boosted upon infection with HCV<sup>UV</sup> at either 6 or 72 hpi.  
170 While minimal IRG upregulation was observed upon infection with replication competent  
171 HCV at 6 hours, substantial induction was observed at 72 hpi. In contrast, basal IRG  
172 expression was demonstrably lower or completely absent in Huh-7.5 cells when  
173 compared to PHHs, and no induction was observed upon HCV infection at either  
174 sampling point.

175 **Antiviral defenses in PHHs suppress HCV replication and completely**  
176 **abrogate virion release.** To validate our RNA-seq data, we performed RT-qPCR on a  
177 selected set of test genes and compared levels of gene induction in both systems.  
178 These data confirm a remarkable level of concordance between the two systems and  
179 confirm our RNA-seq data accurately records both steady-state and virus-inducible gene  
180 expression (Fig 2A). To determine HCV infection rates and investigate the effects of IRG  
181 induction on HCV RNA replication, vRNA RT-qPCR was performed on cellular RNAs  
182 from PHHs and Huh-7.5 cells. Individual cells contain between 10-30pg total RNA: 1µg  
183 therefore represents  $3.3 \times 10^4$  -  $1.0 \times 10^5$  cells. At 6 hpi in PHHs we observed a mean of  
184  $6.2 \times 10^4$  HCV GE/ug total RNA, which equates to an initial infection rate of 0.5 – 1.6 viral  
185 genome copies per cell (Fig 2B, top panel). This copy number remained stable at 72  
186 hpi, likely reflecting low-level HCV replication with suppression mediated by PAMP-  
187 induced innate immunity. In contrast, while slightly lower infection rates were observed  
188 in Huh-7.5 cells at 6 hpi, a 2-log increase in vRNA was apparent at 72 hpi (Fig 2B,  
189 bottom panel), consistent with a lack of IRG upregulation in Huh-7.5 cells. As expected,  
190 minimal signal was detected in CM or HCV<sup>UV</sup> treated cells. To determine rates of  
191 infectious particle production, TCID<sub>50</sub> titrations were performed in parallel on



192 supernatants harvested from infected PHHs and Huh-7.5 cells (Fig 2C). Titers at 6 hpi  
193 likely represent carryover of initial inoculum, despite extensive washing. While infectious  
194 virion secretion was completely absent in supernatants from PHHs at 72 hpi, HCV  
195 virions were detected at  $\sim 1 \times 10^5$  TCID<sub>50</sub>/ml in supernatants from Huh-7.5 cells at 72 hpi.  
196 To investigate this further, virion secretion was determined in PHHs which were pre-  
197 treated with the JAK/STAT inhibitor ruxolitinib prior to infection. Ruxolitinib pre-treatment  
198 rescued HCV virion release at 72 hpi indicating the ablation of virion production in PHHs  
199 is mediated by JAK/STAT-inducible immunity (Fig 2C, top panel). Moreover, these  
200 results were confirmed via immunofluorescence staining for viral antigen. At 72 hpi,  
201 perinuclear NS5A localization in PHHs was only visible after JAK/STAT inhibition (Fig  
202 2D) but readily detected in Huh-7.5 cells without pharmacological immune suppression  
203 (Fig 2E). Together, these data indicate that plated PHHs possess intact innate immunity  
204 which suppresses initial HCV replication and completely blocks virion release. This  
205 inducible immunity is absent in Huh-7.5 cells.

206 **HCV infection of PHHs dysregulates gene programs associated with diverse**  
207 **biological functions.** Statistical analyses were performed to quantify differentially  
208 expressed genes (DEGs) induced upon HCV infection of PHHs (FDR  $P < 0.05$ ). For  
209 replication competent HCV infections, a temporally structured increase in DEGs was  
210 observed (Fig 3A, left panel and Fig 3B) which partially overlapped (Fig. 3C). At 6 hpi,  
211  $n=81$  infection-induced DEGs were apparent – this number was markedly amplified at  
212 72 hpi (DEGs  $n=2985$ ) and indicates HCV-infection ultimately induces a substantial shift  
213 in the PHH transcriptional landscape (Fig 3A, left panel and 3B). For HCV<sup>UV</sup> infections, a  
214 contrasting temporally-structured reduction in DEG signatures was observed: an initial

215 transcriptional response to HCV<sup>UV</sup> was detected at 6 hpi (n=239) which declined to  
216 virtually no detectable dysregulation at 72 hpi (n=12) (Fig 3A, left panel).

217 To determine the biological processes associated with HCV-induced DEGs, gene  
218 ontology (GO) enrichment analyses were performed. At 6 hpi, HCV and HCV<sup>UV</sup> enriched  
219 GO categories were associated with shared and distinct biological processes (Fig 3A  
220 right panel and Fig 3D, two upper panels). Of note, only PHHs infected with replication  
221 competent HCV demonstrated enrichment of GO categories associated with IFN  
222 signaling or pathogen defense: dysregulation of these gene classes were absent in  
223 HCV<sup>UV</sup> infected PHHs. These data represent the early yet restricted signatures of the  
224 hepatocyte antiviral response and confirm this response is induced only by replication  
225 competent vRNAs.

226 Proportional to the quantity of HCV-induced DEGs, a large number of highly  
227 significant enriched GO categories were identified at 72 hpi, which were associated with  
228 diverse biological processes (Fig 3A, right panel and 3D, bottom panel). Overlap with  
229 DEGs representing described IRGs (n=390) (7, 22) or IRG-interactors (n=2582) (22) (Fig  
230 3C, bottom panel) resulted in enrichment of multiple GO categories associated with  
231 antiviral responses and innate immunity (Fig 3D, bottom panel). However, many DEGs  
232 were not classical IRGs/IRG-interactors and represent biological processes not  
233 automatically associated with the antiviral response (eg. ribosome biogenesis,  
234 translation initiation and protein targeting to the ER) (Fig 3D, bottom panel). Examples of  
235 opposing patterns of gene dysregulation can be seen in Fig 3E for two representative  
236 GO categories: while genes associated with defense response to virus are generally  
237 strongly upregulated at 72 hpi, genes associated with protein targeting to the ER are  
238 almost exclusively down regulated. Together, these early snap-shots of virus-induced

239 cellular changes confirm temporally regulated transcriptional responses to HCV infection  
240 in adult PHHs, with the magnitude of gene induction increasing exponentially from 6 to  
241 72 hpi.

242 **Divergent transcriptional responses to HCV infection and ectopic *IRF1* expression**  
243 **in Huh-7.5 cells.** Huh-7.5 cells represent the most frequently used cell-line for HCV  
244 propagation in research. Consequently, we also cataloged global HCV-induced  
245 transcriptional responses in these cells for comparative purposes. Similar to PHH,  
246 statistical analyses identified a time-dependent increase in significant HCV-induced  
247 DEGs and enriched GO categories (Fig 4A).

248 Intrinsic *IRF1* expression has been reported to maintain the baseline transcription  
249 of a program of antiviral genes, independently of the IFN system (23, 24). To quantify  
250 the *IRF1*-regulon in human cells of hepatic origin, we transcriptionally re-programmed  
251 Huh-7.5 cells by ectopically expressing *IRF1*. DEGs and GO enriched categories  
252 induced by HCV at 72 hpi, and ectopic *IRF1* expression were numerically similar (Fig 4A  
253 and 4B). However, the underlying dysregulated genes exhibited approximately 10%  
254 overlap (Fig 4C, upper panel) and the significantly enriched biological processes  
255 associated with the dysregulated genes were highly divergent (Fig 4D). HCV induced  
256 genes in Huh-7.5 cells were associated with diverse biological processes presumably  
257 facilitating viral propagation, including circadian rhythm or amino acid transport (Fig 4D,  
258 upper panel) and showed minimal overlap with HCV-induced genes in PHHs (Fig 4C,  
259 lower panel). In contrast, *IRF1* regulated genes were largely but not exclusively  
260 associated with GO categories related to innate immunity or pathogen defense (Fig 4D,  
261 lower panel). Examples of *IRF1*-mediated gene dysregulation are shown for two  
262 representative GO categories associated with innate immunity (Fig 4E). In summary,

263 these data expand the *IRF1*-regulon identified by gene microarrays in (7) (n=130) by an  
264 additional 329 genes (n=459) and confirm that Huh-7.5 cells retain the capacity to mount  
265 antiviral defenses. Our highly sensitive RNA-seq profiling identified an additional 271  
266 low-abundance transcripts as significantly dysregulated (FDR p-values <0.05, final  
267 RPKM <1) although these were omitted from subsequent analyses to increase  
268 stringency.

### 269 **Baseline *IRF1* expression coordinates an intrinsic antiviral program in PHHs.**

270 Using our previously selected panel of control genes (Fig 1D), we visualized baseline  
271 expression of IRGs in uninfected Huh-7.5 cells transduced with an EMPTY lentivirus,  
272 Huh-7.5 *IRF1* cells and uninfected PHHs. We observed highly similar baseline IRG  
273 expression in Huh-7.5 *IRF1* cells and uninfected PHHs, distinct from Huh-7.5 EMPTY  
274 cells (Fig 5A, upper panel). We also visualized baseline expression of *IRF1* in Huh-7.5  
275 cells and PHHs, and compared expression levels to pattern recognition receptors  
276 (PRRs) which recognize cytosolic dsRNA (Fig 5A, lower panel). These data confirm  
277 minimal *IRF1* expression in Huh-7.5 cells, 4-fold lower than PHH baseline expression.  
278 These observations further reveal much higher baseline expression of cytosolic dsRNA  
279 sensors *TLR3*, *DDX58* (RIG-I) and *IFIH1* (MDA5) in PHHs when compared to Huh-7.5  
280 cells, which likely contribute to the differences observed in inducible antiviral immunity.

281 Next, we compared mean expression of *IRF1* regulated genes from both Huh-7.5  
282 EMPTY and Huh-7.5 *IRF1* cells to expression in PHHs. Applying robust statistical  
283 methods to compare gene subsets from two distinct enriched GO categories within the  
284 *IRF1*-regulon, we performed area under the curve (AUC) and correlation analyses. AUC  
285 analyses confirmed that expression of *IRF1* regulated genes in Huh-7.5 *IRF1* cells was  
286 more closely related to baseline expression in PHH than in Huh-7.5 EMPTY cells (Fig

287 5B). Of note, this pattern was more pronounced for genes associated with immune  
288 system process (GO: 000 2376) than for genes associated with regulation of metabolic  
289 process (GO:0019222). Correlation analyses compared mean expression of individual  
290 *IRF1* regulated genes in PHHs to both Huh-7.5 EMPTY and Huh-7.5 *IRF1* cells (Fig 5C).  
291 While all comparisons were significantly correlated ( $P<0.0001$ ), higher Pearson's  $r$   
292 values were observed for Huh-7.5 *IRF1* cells ( $r=0.52$ , and  $r=0.53$ ) than for Huh-7.5  
293 EMPTY cells ( $r=0.36$ , and  $r=0.42$ ), indicating that ectopic expression of *IRF1* pushes the  
294 Huh-7.5 cell transcriptome to a more PHH-like state. Correspondingly, this pattern was  
295 again more pronounced for immune system process genes (GO: 0002376) than genes  
296 associated with regulation of metabolic process (GO:0019222) (Fig 5C). *IRF1* also  
297 represents an IRG and its expression is further boosted by HCV infection (Fig 3E, upper  
298 panel). Consequently, we next determined what proportion of the *IRF1*-regulon is further  
299 dysregulated upon HCV infection of PHHs (Fig 5D). These analyses identify  $n=178$   
300 *IRF1*-regulated genes who's expression is significantly dysregulated by HCV infection of  
301 PHHs, indicating *IRF1* also contributes to inducible immunity.

302 To determine the effect of ectopic *IRF1* expression on HCV RNA replication, we  
303 transfected either Huh-7.5 EMPTY or Huh-7.5 *IRF1* cells with a subgenomic replicon  
304 (SGR) containing the non-structural proteins NS3-NS5B from strain JFH-1 coupled to a  
305 firefly luciferase (F-luc) reporter, and monitored luciferase accumulation over time (Fig  
306 5E). These experiments confirm that the transcriptional program mediated by *IRF1* has  
307 the ability to reduce HCV RNA replication significantly. We also performed transfections  
308 in the presence of the HCV replication inhibitor 2'CMA, or a DMSO vehicle control. The  
309 significant *IRF1* mediated reduction in RLU was also apparent at 4 hours post  
310 transfection in Huh-7.5 *IRF1* cells, which was not the case in 2'CMA treated cells,

311 indicating the *IRF1* gene program also negatively impacts viral genome translation,  
312 possibly due to direct targeting or competition with host IRG mRNAs for available  
313 ribosomes (Fig 5E). In summary, these analyses provide supportive evidence that *IRF1*  
314 coordinates the baseline expression of antiviral effector genes in PHHs in the absence  
315 of infection, and also contributes to inducible immunity. The antiviral effect mediated by  
316 the *IRF1* gene program was able to reduce HCV replication/translation by 1-2-logs.  
317 Thus, in addition to the observed triggering of antiviral defenses by HCV, it is likely that  
318 this suite of intrinsically expressed genes in PHHs contributes to defense against  
319 incoming virus.

320 **Comparison of transcriptional regulators and targeted canonical pathways.** To  
321 determine upstream transcriptional regulators, which orchestrate changes in gene  
322 expression induced by HCV infection of PHHs or Huh-7.5 cells, or ectopic *IRF1*  
323 expression in Huh-7.5 cells, we performed Ingenuity Upstream Regulator Analysis  
324 (Qiagen). Focusing on nuclear transcription factors (TFs), we observed significant  
325 activation (blue) or inhibition (orange) ( $p < 0.05$ ) of diverse transcriptional regulators (Fig  
326 6A), with distinct and overlapping TF profiles observed for each dataset. Limited overlap  
327 ( $n=5$ ) was observed between the TFs of coordinating transcriptional responses to HCV  
328 infection in PHHs and Huh-7.5 cells. Of note, low oxygen tension has been  
329 demonstrated to enhance HCV RNA replication (25) and activation of the hypoxia  
330 inducible factor 1- alpha (HIF1A) is observed in both systems, which is a known  
331 regulator of transcriptional responses to hypoxia (26).

332 As expected, considerable overlap was observed between the transcriptional  
333 regulators coordinating the observed patterns of gene dysregulation detected in HCV  
334 infected PHH and *IRF1* reprogramed Huh-7-5 cells, as *IRF1* is further upregulated upon

335 HCV infection of PHHs. Multiple shared TFs known to activate antiviral programs were  
336 activated. Furthermore, these analyses demonstrate that ectopic *IRF1* expression  
337 additionally activates an array of transcriptional regulators, resulting in a broad induction  
338 of antiviral effectors and highlights that *IRF1* co-ordinates a complex web of multiple  
339 TFs, which collectively contribute to the *IRF1* regulon.

340 To further explore these data, we used Ingenuity Pathway Analysis (IPA)  
341 (Qiagen) to investigate which canonical cellular pathways are affected by HCV- or *IRF1*-  
342 mediated gene dysregulation. Shared and distinct canonical pathways were targeted in  
343 all three systems (Fig 6B, only top 10 hits presented). Notably, for HCV infection of PHH,  
344 a number of targeted pathways were associated with innate immune responses  
345 including 'Interferon Signaling', 'Antigen Presentation Pathway' and 'Activation of  
346 cytosolic IRF by PRRs'. Targeted transcriptional dysregulation of pathway components  
347 associated with IFN-mediated innate immunity were absent in HCV infected Huh-7.5  
348 cells. As Huh-7.5 cells do not produce IFN and possess impaired antiviral effector  
349 responses, we reasoned that these HCV-targeted pathways represent pro-viral  
350 transcriptional manipulation to facilitate HCV propagation. Cell-intrinsic pathways  
351 targeted by *IRF1* were generally involved in innate immunity and exhibited some cross-  
352 over with HCV infected PHHs, including 'Interferon Signaling', 'Antigen Presentation  
353 Pathway' and 'Complement System'.

354 In HCV infected PHHs, in addition to pathways associated with classical IFN-  
355 mediated innate immunity, we also observed targeting of unrelated pathways including  
356 'EIF2 signaling', 'Mitochondrial Dysfunction' and 'mTOR signaling'. The top targeted  
357 pathway in HCV infected PHHs was 'EIF2 signaling' and detailed inspection of this  
358 pathway identified significantly dysregulated molecules at multiple pathway stages (Fig.

359 6B, left panel). Corresponding changes in gene expression for targeted molecules within  
360 the 'EIF2 signaling' pathway highlight significant downregulation of genes which  
361 comprise the structural components of ribosomes and the translation pre-initiation  
362 complex. In contrast, significant upregulation *PKR* and *MYC* is observed. (Fig. 6B, right  
363 panels). Together these analyses provide a broad overview of the transcriptional  
364 regulators which orchestrate HCV or *IRF1*-mediated gene dysregulation, and the  
365 downstream cell-intrinsic pathways which they target.

## 366 **DISCUSSION**

367 In this study, we sought to quantify and dissect initial global transcriptional  
368 responses to HCV infection of authentic target cells - adult PHHs. Acquiring these data  
369 *in vivo* is particularly challenging: Indeed, HCV has a highly restricted cellular tropism  
370 and efficiently infects only human hepatocytes. The liver is a solid organ which is  
371 composed of multiple cell types (27) and while hepatocytes represent the major cell-  
372 type, these cells are not readily accessible for sampling. Acute HCV infection is also  
373 often asymptomatic and so initial infections often go unnoticed. Here, we sought to  
374 overcome these hurdles by performing *ex vivo* infections on PHHs isolated from adult  
375 donors that were not previously infected with HCV or treated with IFN. Our quantification  
376 of initial acute phase responses to infection in adult PHHs provides a snapshot of early  
377 perturbations in the hepatocyte transcriptional landscape induced by HCV infection.

378 In agreement with reported spatiotemporal shifting of early HCV replication  
379 complexes within the cytosol, patterns of HCV-induced gene dysregulation were time-  
380 structured in adult PHHs. Limited gene induction was observed at 6 hpi, where initial  
381 viral replication complexes are associated with ribosomes (19). However, weak induction  
382 of a restricted panel of IRGs was detected, which were not upregulated in HCV<sup>UV</sup> treated



383 cells, and represents the first signatures of PHHs antiviral response to replication  
384 competent HCV. This limited induction of antiviral effectors shortly after infection could  
385 represent HCV NS3/4A-mediated targeting of MAVS, which dampens host antiviral  
386 responses (28), and contrasts with IFN or PolyI:C treatment of PHHs, where early DEG  
387 induction at 6 hours is associated with broad IFN-mediated responses (29).  
388 Alternatively, intrinsic *IRF1* expression in PHHs may limit the replication capacity of  
389 incoming virus (see below for further discussion), reducing the accumulation of dsRNA  
390 and therefore delaying broad innate immune induction. In contrast to 6 hpi DEGs, the  
391 spatial transitioning of viral replication complexes to remodeled ER membranes at 72 hpi  
392 (20) coincided with an exponential amplification of HCV infection-mediated  
393 transcriptional dysregulation. We detected significant dysregulation of ~3000 genes,  
394 associated with a diverse array of biological processes.

395 At 72 hpi in PHHs, we observed expansive induction of IFN-triggered antiviral  
396 effector genes, promoting suppression of viral replication and abrogation of particle  
397 release. However, 80% of HCV infected individuals fail to mount effective responses  
398 facilitating the progression to chronicity and viruses have evolved a variety of innate  
399 immune evasion strategies to promote their propagation, which includes host-  
400 translational shut-off (30). Indeed, while HCV infection results in effective IRG induction,  
401 virus induced phosphorylation of PKR inhibits eIF2 $\alpha$  and therefore blocks host IRG  
402 protein translation (31). PKR activation is therefore advantageous to HCV and prevents  
403 clearance because while translation of capped host mRNAs are dependent on  
404 eukaryotic initiation factors (eIFs), HCV polyprotein translation occurs independently of  
405 eIFs using an IRES located in the 5'UTR of the viral genome (32). Further to the  
406 described HCV inhibition of eIF2 $\alpha$  (31), our transcriptional profiling identifies broad down

407 regulation of multiple components of the host translational machinery. Mechanistically,  
408 this process is likely mediated by the TF MYC, which is known to directly regulate  
409 ribosome biogenesis and translation, controlling the expression of RPS and RPL  
410 proteins of the small and large ribosomal subunits, in addition to the gene products  
411 necessary for rRNA processing, nuclear export of ribosomal subunits and mRNA  
412 translation initiation (33). Interestingly, in PHHs, significant upregulation of *MYC* mRNA  
413 results in down-regulation of the gene products it controls (Fig 6C, right panels). These  
414 data may represent a previously unappreciated mechanism whereby downregulation of  
415 constituent components of the translational machinery arrests the translation of antiviral  
416 effector genes. Contrastingly, MYC is predicted to be inhibited in upstream regulator  
417 analysis (Fig. 5A). Detailed investigation of the genes involved in the prediction MYC  
418 inhibition and the interactions included in the IPA knowledge base highlights a number  
419 of genes involved in IFN-signaling based on microarray analysis in plasmacytoid  
420 dendritic cells (pDC) (34). These genes are highly upregulated upon *MYC* knockdown in  
421 pDCs and the same genes are induced in the antiviral immune response in PHH upon  
422 HCV infection. Differences between cellular responses in pDCs and PHH or upon  
423 knockdown of MYC compared to HCV infection may result in upregulation of *MYC* in our  
424 data set. Together, these data simultaneously capture infection-induced transcriptional  
425 signatures associated with pro-viral translational shut-off and anti-viral IFN signaling.

426 Furthermore, we observed transcriptional dysregulation of additional gene  
427 programs which have been reported to modulate susceptibility to HCV. We observed  
428 targeting of the mTOR signaling pathway, which has been reported as pro-viral, with  
429 mTOR inhibitor rapamycin targeting HCV replication in vitro and reducing viral RNA  
430 levels in patients post transplantation (35). HCV infection has also been shown to

431 activate mTOR and pharmacological inhibition of mTOR was shown to suppress HCV  
432 virion assembly and release in vitro (36). Of note, significant targeting of multiple  
433 pathways associated with nuclear receptor (NR) signaling was detected in both PHHs  
434 and Huh-7.5 cells, further confirming that Huh-7.5 cells retain some HCV-inducible  
435 programs that are of biological relevance. NR-mediated signaling regulates  
436 transcriptional programs that control host metabolic processes and lipid metabolism and  
437 are reported to modulate susceptibility to HCV infection in both humans (37) and mice  
438 (38).

439 In addition to HCV activation of pro- and antiviral cascades, we also investigated  
440 the contribution of *IRF1*-mediated intrinsic immunity in PHHs to the control of HCV  
441 replication. IRF1 is a TF that participates in IFN induction but also directly induces a  
442 subset of IRGs. Additionally, *IRF1* represents a potent pan-viral restriction factor and a  
443 key component of the cellular antiviral response (7). Using microarray analysis,  
444 Schoggins *et al.* identified a panel of 130 partially overlapping, *IRF1*-regulated genes  
445 (>3-fold) via lentiviral over-expression in Huh-7 and *STAT1*<sup>-/-</sup> fibroblasts. More recently it  
446 has been demonstrated that constitutive expression of *IRF1* in immortalized PH5CH5  
447 cells of hepatic origin (24) and BEAS-2B bronchial epithelial cells (23) coordinates  
448 intrinsic antiviral protection independently from the IFN system. Ectopic expression of  
449 *IRF1* in Huh-7.5 cells enabled us to define a greatly expanded *IRF1* regulon, and  
450 comparative statistical analysis of Huh-7.5 EMPTY, Huh-7.5 *IRF1* and uninfected PHHs  
451 transcriptomes provides supportive evidence that baseline immunity in PHHs in the  
452 absence of infection is orchestrated by *IRF1*. Previous studies have shown *IRF1* to be a  
453 potent restrictor of HCV replication (7). We confirm this observation and also determine  
454 that *IRF1* can significantly inhibit HCV subgenome translation in Huh-7.5 cells. While

455 intrinsic *IRF1* expression in PHHs maintains a suite of genes that can actively suppress  
456 HCV translation and replication, which may contribute to the low-levels of gene induction  
457 at 6 hpi, this translational suppression could be partially overcome by the host  
458 translational shut-off we observe at 72 hpi.

459 In summary, the virus-host interactions which determine the susceptibility of  
460 human hepatocytes to initial HCV infection and their capacity to support persistent  
461 infection are incompletely defined. The high levels of genetic diversity seen between  
462 HCV genotypes point to a long period association for virus and host co-evolution (39)  
463 and HCV has evolved multiple strategies to hijack the host cell machinery required to  
464 facilitate its propagation, while at the same time evading host defenses. We observe early  
465 concurrent transcriptional dysregulation of gene programs which facilitate viral  
466 persistence, balanced against those which promote viral inhibition. This cellular pro- and  
467 anti-viral antagonism may keep HCV replication levels below a clearance threshold in  
468 the initial phase of infection and ultimately facilitate progression to chronicity.

## 469 **MATERIALS AND METHODS**

470 **Source of PHHs.** PHHs were isolated from surgical liver resections as previously  
471 described (18). PHHs were obtained with informed consent approved by the ethics  
472 commission of Hannover Medical School (Ethik-Kommission der MHH, #252-2008).  
473 Additionally, PHHs were commercially obtained (Lonza, Basel, Switzerland).  
474 Cryopreserved PHH were thawed as recommended by the manufacturer.

475 **Virus production and UV-inactivation.** Huh-7.5 cells were electroporated with  
476 HCV genomic RNA transcripts (Jc1 strain) (40, 41) and supernatants were harvested at  
477 48, 72 and 96 hours post-electroporation, filtered (0.45 micron pores), pooled, aliquoted

478 and frozen at -80°C. A portion of this virus stock was UV-inactivated in 6-well-dish with  
479 1ml per well at 5J/cm<sup>2</sup>.

480 **Generation of Huh-7.5 *IRF1* cells.** The *IRF1*-coding sequence (gBlock®, IDT)  
481 was cloned into lentiviral vector pWPI-bla (Addgene) and confirmed by Sanger  
482 sequencing (GATC). Co-transfection of plasmids encoding VSV-G, HIV-1gag/pol and  
483 pWPI-bla-*IRF1* into HEK293T cells was performed using Lipofectamine 2000  
484 (Invitrogen). Supernatants containing lentiviral pseudoparticles for transgene delivery  
485 were harvested at 24 h and 48h, pooled, filtered (0.45 micron pores) and used to  
486 transduce 2×10<sup>5</sup> Huh-7.5 cells. Seventy-two hours post transduction, blasticidin (10  
487 ug/ml) was added to media. For control purposes, Huh-7.5 cells were also transduced  
488 with pseudoparticles containing an empty pWPI-bla vector (no transgene expressed).  
489 After blasticidin addition, surviving cells were expanded via passaging for 14 days prior  
490 to freezing at -150°C with 10% DMSO.

491 **HCV infection and RNA isolation.** PHH infections were performed at a  
492 multiplicity of infection of 1 (MOI 1) calculated on Huh-7.5 cells and the same volume  
493 was used for treatment with UV-inactivated virus. Four hours post-inoculation, cells were  
494 washed with PBS and 1 ml of fresh Hepatocyte Culture Medium (HCM) was added per  
495 well (Lonza). At 6 or 72 hpi, supernatants were collected and cells were lysed in 1 ml  
496 TRIzol® reagent (Invitrogen) or RA1 buffer supplemented with β-mercaptoethanol  
497 (Macherey-Nagel). All samples were stored at -80°C until processing. Total RNA was  
498 extracted according to the manufacturer's instructions. For infection of Huh-7.5 empty  
499 vector transduced cells, identical conditions were used except DMEM was used instead  
500 of HCM media and RNA extractions were performed using only the NucleoSpin RNA kit  
501 (Macherey-Nagel). Where ruxolitinib treatment is indicated, PHHs were pretreated with

502 10 $\mu$ M ruxolitinib on the day before HCV infection. For the rescue of viral particle  
503 production (Fig 2C), 10 $\mu$ M ruxolitinib was also added to HCM media directly after  
504 infections.

505 **Subgenomic replicon assays.** Huh-7.5 cells expressing *IRF1* or transduced with  
506 an EMPTY lentivirus were electroporated with equal amounts (2.5 $\mu$ g) of a firefly  
507 luciferase (F-luc) expressing subgenomic replicon RNA (NS3-NS5B, strain JFH-1) and  
508 seeded onto 12-well dishes. Additionally, EMPTY control cells were treated with 1  $\mu$ M  
509 2'CMA or DMSO. Cells were lysed at 4, 24, 48, 72 and 96 hours post electroporation in  
510 350  $\mu$ l passive lysis buffer (Promega) per well and frozen at -20°C until measurement of  
511 F-luc expression with a tube luminometer.

512 **TCID<sub>50</sub> and RT-qPCR.** Viral titers in cellular supernatants and viral stocks used  
513 for infection experiments were quantified on Huh-7.5 cells using a limiting dilution assay  
514 as previously described (42). The limit of quantification was determined by the lowest,  
515 still evaluable result in the assay set up. A quantitative, one-step RT-qPCR was  
516 performed to determine intracellular HCV-RNA copy numbers, using the “Light Cycler  
517 480 RNA Master Hydrolysis Probes” kit (Roche) and an HCV specific primer-probe set  
518 targeting the 5' UTR region. RT-qPCR was performed using a Light Cycler 480 (Roche).  
519 Ten RNA copies was the lowest number used to calculate the standard curve.

520 To determine relative gene expression of selected cellular genes, 250 ng of total  
521 cellular RNA were reverse transcribed using the Takara Reverse Transcription (RT) kit.  
522 Takara's SYBR Premix Ex Taq II was used according to manufacturers' instructions with  
523 gene specific primers. RT-qPCR was performed using a Light Cycler 480 (Roche).  
524 Changes in relative gene expression were calculated according to the  $2^{-\Delta\Delta CT}$  method  
525 (43).

526           **RNA-seq.** Cellular RNAs were used to generate sequencing libraries using a  
527 ScriptSeqv2 kit (Illumina), run on the Illumina HiSeq 2500 platform, and subsequent data  
528 analyses were performed using CLC Genomics Workbench (Qiagen, Aarhus) (44).  
529 Mapping against human reference genome (hg38) was performed for individual samples  
530 and relative transcript expression was calculated from raw count data via normalization  
531 to gene length (RPKM) (45). Identification of differentially expressed genes (DEGs) was  
532 conducted by comparing raw count data, with calculation of false discovery rate (FDR)  
533 p-values for multiple comparisons. Significant DEGs with low expression (FDR p-values  
534 <0.05 with a final RPKM <1) were omitted from subsequent GO, TF and pathway  
535 analyses.

536           **GO enrichment analyses.** GO analyses were performed using the GO Resource  
537 (<http://geneontology.org/>). ENSEMBL identifiers for DEGs were used as input and  
538 identification of significantly enriched GO categories was performed using the Panther  
539 Classification system (<http://pantherdb.org/>). *P*-values for specific GO categories were  
540 generated after Bonferroni correction for multiple testing. Redundant GO terms were  
541 removed with REVIGO (46) (<http://revigo.irb.hr>) with the following settings: allowed  
542 similarity “tiny”, GO term sizes database “Homo sapiens” and “SimRel” semantic  
543 similarity measure. Remaining terms were visualized in semantic similarity-based  
544 scatterplots using GraphPad Prism v9.0.

545           **Canonical pathway analysis and transcriptional regulators.** Pathway  
546 analyses were performed using Ingenuity Pathway Analysis (Qiagen, Aarhus) (47).  
547 Input data included ENSEMBL identifiers, FDR-p-values and fold change values for  
548 DEGs determined using CLC genomics workbench. Default settings were used for all  
549 categories except for species, which was set to human. Z-scores were calculated based

550 on the expression fold change. IPA compares input data sets with the ingenuity  
551 knowledge base which represents a collection of published interactions of molecules.  
552 Upstream regulators are determined bioinformatically  
553 ([http://pages.ingenuity.com/rs/ingenuity/images/0812%20Upstream\\_regulator\\_analysis\\_](http://pages.ingenuity.com/rs/ingenuity/images/0812%20Upstream_regulator_analysis_whitepaper.pdf)  
554 [whitepaper.pdf](http://pages.ingenuity.com/rs/ingenuity/images/0812%20Upstream_regulator_analysis_whitepaper.pdf)). Analyses outputs were exported as excel sheets or pdf files and data  
555 re-plotted with GraphPad and Adobe illustrator. Disease-, cancer- and non-hepatocyte-  
556 associated pathways were omitted from presented diagrams

557 **Data Availability.** RNA-seq data generated in this study and subsequent  
558 downstream analyses including identification of DEGs, enriched GOs categories,  
559 upstream TFs and targeted pathways are submitted to the NCBI GEO database (GEO  
560 accession number GSE166428).

## 561 **ACKNOWLEDGEMENTS**

562 We thank Charles Rice (Rockefeller University) for Huh-7.5 cells and anti-NS5A  
563 antibody 9E10. We also thank Robert Geffers, Michael Jarek, Maren Scharfe and Sabin  
564 Bhujju (HZI Braunschweig, GMAK facility) for RNA-seq library preparation and  
565 generation of HiSeq 2500 raw data. RJPB was supported by BMG grant 1-2516-FSB-  
566 416. TP was supported by a grant from the European Research Council ERC-2011-  
567 StG\_281473-(VIRAFRONT). TP was also funded by the Deutsche  
568 Forschungsgemeinschaft (DFG, German Research Foundation) under Germany's  
569 Excellence Strategy –EXC 2155 “RESIST”-project ID 39087428.

## 570 **REFERENCES**

- 571 1. Pietschmann T, Brown RJP. 2019. Hepatitis C Virus. Trends in Microbiology  
572 27:379–380. doi:10.1016/j.tim.2019.01.001.
- 573 2. Vieyres G, Pietschmann T. Tracking hepatitis C virus interactions with hepatic lipid  
574 metabolism – A hitchhiker's guide to solve remaining translational research



- 575 challenges in hepatitis C, Chapter 71. *In* The Liver – Biology and Pathobiology, 6th  
576 edition.
- 577 3. Vasallo C, Gastaminza P. 2015. Cellular stress responses in hepatitis C virus  
578 infection: Mastering a two-edged sword. *Virus Res* 209:100–117.  
579 doi:10.1016/j.virusres.2015.03.013.
- 580 4. Gluchowski NL, Becuwe M, Walther TC, Farese Jr RV. 2017. Lipid droplets and liver  
581 disease: from basic biology to clinical implications. *Nature Reviews*  
582 *Gastroenterology & Hepatology* 14:343. doi:10.1038/nrgastro.2017.32.
- 583 5. Horner SM, Gale, M., Jr. 2013. Regulation of hepatic innate immunity by hepatitis C  
584 virus. *Nat Med* 19:879–888. doi:10.1038/nm.3253.
- 585 6. Bowie AG, Unterholzner L. 2008. Viral evasion and subversion of pattern-  
586 recognition receptor signalling. *Nat Rev Immunol* 8:911–922. doi:10.1038/nri2436.
- 587 7. Schoggins JW, Wilson SJ, Panis M, Murphy MY, Jones CT, Bieniasz P, Rice CM.  
588 2011. A diverse range of gene products are effectors of the type I interferon antiviral  
589 response. *Nature* 472:481–485. doi:10.1038/nature09907.
- 590 8. Woodhouse SD, Narayan R, Latham S, Lee S, Antrobus R, Gangadharan B, Luo S,  
591 Schroth GP, Klenerman P, Zitzmann N. 2010. Transcriptome sequencing,  
592 microarray, and proteomic analyses reveal cellular and metabolic impact of hepatitis  
593 C virus infection in vitro. *Hepatology* 52:443–453. doi:10.1002/hep.23733.
- 594 9. Papic N, Maxwell CI, Delker DA, Liu S, Heale BS, Hagedorn CH. 2012. RNA-  
595 sequencing analysis of 5' capped RNAs identifies many new differentially expressed  
596 genes in acute hepatitis C virus infection. *Viruses* 4:581–612.  
597 doi:10.3390/v4040581.
- 598 10. Blackham S, Baillie A, Al-Hababi F, Remlinger K, You S, Hamatake R, McGarvey  
599 MJ. 2010. Gene expression profiling indicates the roles of host oxidative stress,  
600 apoptosis, lipid metabolism, and intracellular transport genes in the replication of  
601 hepatitis C virus. *J Virol* 84:5404–5414. doi:10.1128/JVI.02529-09.
- 602 11. Boldanova T, Suslov A, Heim MH, Necselea A. 2017. Transcriptional response to  
603 hepatitis C virus infection and interferon-alpha treatment in the human liver. *EMBO*  
604 *Mol Med* 9:816–834. doi:10.15252/emmm.201607006.
- 605 12. Thomas E, v. d. Gonzalez, Li Q, Modi AA, Chen W, Nouredin M, Rotman Y, Liang  
606 TJ. 2012. HCV infection induces a unique hepatic innate immune response  
607 associated with robust production of type III interferons. *Gastroenterology* 142:978–  
608 988. doi:10.1053/j.gastro.2011.12.055.
- 609 13. Park H, Serti E, Eke O, Muchmore B, Prokunina-Olsson L, Capone S, Folgori A,  
610 Rehermann B. 2012. IL-29 is the dominant type III interferon produced by  
611 hepatocytes during acute hepatitis C virus infection. *Hepatology* 56:2060–2070.  
612 doi:10.1002/hep.25897.
- 613 14. Metz P, Dazert E, Ruggieri A, Mazur J, Kaderali L, Kaul A, Zeuge U, Windisch MP,  
614 Trippler M, Lohmann V, Binder M, Frese M, Bartenschlager R. 2012. Identification of  
615 type I and type II interferon-induced effectors controlling hepatitis C virus replication.  
616 *Hepatology* 56:2082–2093. doi:10.1002/hep.25908.

- 617 15. Sheahan T, Imanaka N, Marukian S, Dorner M, Liu P, Ploss A, Rice CM. 2014.  
618 Interferon lambda alleles predict innate antiviral immune responses and hepatitis C  
619 virus permissiveness. *Cell Host Microbe* 15:190–202.  
620 doi:10.1016/j.chom.2014.01.007.
- 621 16. Andrus L, Marukian S, Jones CT, Catanese MT, Sheahan TP, Schoggins JW, Barry  
622 WT, Dustin LB, Trehan K, Ploss A, Bhatia SN, Rice CM. 2011. Expression of  
623 paramyxovirus V proteins promotes replication and spread of hepatitis C virus in  
624 cultures of primary human fetal liver cells. *Hepatology* 54:1901–1912.  
625 doi:10.1002/hep.24557.
- 626 17. Wang Z, Gerstein M, Snyder M. 2009. RNA-Seq: a revolutionary tool for  
627 transcriptomics. *Nature reviews Genetics*.
- 628 18. Kleine M, Riemer M, Krech T, DeTemple D, Jager MD, Lehner F, Manns MP,  
629 Klempnauer J, Borlak J, Bektas H, Vondran FW. 2014. Explanted diseased livers - a  
630 possible source of metabolic competent primary human hepatocytes. *PLoS One*  
631 9:e101386. doi:10.1371/journal.pone.0101386.
- 632 19. Shulla A, Randall G. 2015. Spatiotemporal analysis of hepatitis C virus infection.  
633 *PLoS Pathog* 11:e1004758. doi:10.1371/journal.ppat.1004758.
- 634 20. Romero-Brey I, Merz A, Chiramel A, Lee JY, Chlanda P, Haselman U, Santarella-  
635 Mellwig R, Habermann A, Hoppe S, Kallis S, Walther P, Antony C, Krijnse-Locker J,  
636 Bartenschlager R. 2012. Three-dimensional architecture and biogenesis of  
637 membrane structures associated with hepatitis C virus replication. *PLoS Pathog*  
638 8:e1003056. doi:10.1371/journal.ppat.1003056.
- 639 21. Blight KJ, McKeating JA, Rice CM. 2002. Highly permissive cell lines for  
640 subgenomic and genomic hepatitis C virus RNA replication. *J Virol* 76:13001–  
641 13014. doi:10.1128/jvi.76.24.13001-13014.2002.
- 642 22. Hubel P, Urban C, Bergant V, Schneider WM, Knauer B, Stukalov A, Scaturro P,  
643 Mann A, Brunotte L, Hoffmann HH, Schoggins JW, Schwemmler M, Mann M, Rice  
644 CM, Pichlmair A. 2019. A protein-interaction network of interferon-stimulated genes  
645 extends the innate immune system landscape. *Nat Immunol* 20:493–502.  
646 doi:10.1038/s41590-019-0323-3.
- 647 23. Panda D, Gjinaj E, Bachu M, Squire E, Novatt H, Ozato K, Rabin RL. 2019. IRF1  
648 Maintains Optimal Constitutive Expression of Antiviral Genes and Regulates the  
649 Early Antiviral Response. *Front Immunol* 10:1019. doi:10.3389/fimmu.2019.01019.
- 650 24. Yamane D, Feng H, Rivera-Serrano EE, Selitsky SR, Hirai-Yuki A, Das A, McKnight  
651 KL, Misumi I, Hensley L, Lovell W, Gonzalez-Lopez O, Suzuki R, Matsuda M,  
652 Nakanishi H, Ohto-Nakanishi T, Hishiki T, Wauthier E, Oikawa T, Morita K, Reid LM,  
653 Sethupathy P, Kohara M, Whitmire JK, Lemon SM. 2019. Basal expression of  
654 interferon regulatory factor 1 drives intrinsic hepatocyte resistance to multiple RNA  
655 viruses. *Nat Microbiol*. doi:10.1038/s41564-019-0425-6.
- 656 25. Vassilaki N, Kalliampakou KI, Kotta-Loizou I, Befani C, Liakos P, Simos G, Mentis  
657 AF, Kalliaropoulos A, Doumba PP, Smirlis D, Foka P, Bauhofer O, Poenisch M,  
658 Windisch MP, Lee ME, Koskinas J, Bartenschlager R, Mavromara P. 2013. Low

- 659 oxygen tension enhances hepatitis C virus replication. *J Virol* 87:2935–2948.  
660 doi:10.1128/JVI.02534-12.
- 661 26. Wang GL, Jiang BH, Rue EA, Semenza GL. 1995. Hypoxia-inducible factor 1 is a  
662 basic-helix-loop-helix-PAS heterodimer regulated by cellular O<sub>2</sub> tension. *Proc Natl*  
663 *Acad Sci U S A* 92:5510–5514. doi:10.1073/pnas.92.12.5510.
- 664 27. Aizarani N, Saviano A, Sagar, Mailly L, Durand S, Herman JS, Pessaux P, Baumert  
665 TF, Grün D. 2019. A human liver cell atlas reveals heterogeneity and epithelial  
666 progenitors. *Nature* 572:199–204. doi:10.1038/s41586-019-1373-2.
- 667 28. Meylan E, Curran J, Hofmann K, Moradpour D, Binder M, Bartenschlager R,  
668 Tschopp J. 2005. Cardif is an adaptor protein in the RIG-I antiviral pathway and is  
669 targeted by hepatitis C virus. *Nature* 437:1167–1172. doi:10.1038/nature04193.
- 670 29. Lauber C, Vieyres G, Terczynska-Dyla E, Anggakusuma, Dijkman R, Gad HH,  
671 Akhtar H, Geffers R, Vondran FW, Thiel V, Kaderali L, Pietschmann T, Hartmann R.  
672 2015. Transcriptome analysis reveals a classical interferon signature induced by  
673 IFNlambda4 in human primary cells. *Genes Immun* 16:414–421.  
674 doi:10.1038/gene.2015.23.
- 675 30. Garcia-Sastre A. 2017. Ten Strategies of Interferon Evasion by Viruses. *Cell Host*  
676 *Microbe* 22:176–184. doi:10.1016/j.chom.2017.07.012.
- 677 31. Garaigorta U, Chisari FV. 2009. Hepatitis C virus blocks interferon effector function  
678 by inducing protein kinase R phosphorylation. *Cell Host Microbe* 6:513–522.  
679 doi:10.1016/j.chom.2009.11.004.
- 680 32. González-Almela E, Williams H, Sanz MA, Carrasco L. 2018. The Initiation Factors  
681 eIF2, eIF2A, eIF2D, eIF4A, and eIF4G Are Not Involved in Translation Driven by  
682 Hepatitis C Virus IRES in Human Cells. *Front Microbiol* 9:207.  
683 doi:10.3389/fmicb.2018.00207.
- 684 33. van Riggelen J, Yetil A, Felsher DW. 2010. MYC as a regulator of ribosome  
685 biogenesis and protein synthesis. *Nat Rev Cancer* 10:301–309.  
686 doi:10.1038/nrc2819.
- 687 34. Kim TW, Hong S, Lin Y, Murat E, Joo H, Kim T, Pascual V, Liu Y-J. 2016.  
688 Transcriptional Repression of IFN Regulatory Factor 7 by MYC Is Critical for Type I  
689 IFN Production in Human Plasmacytoid Dendritic Cells. *J Immunol* 197:3348–3359.  
690 doi:10.4049/jimmunol.1502385.
- 691 35. Stöhr S, Costa R, Sandmann L, Westhaus S, Pfaender S, Anggakusuma, Dazert E,  
692 Meuleman P, Vondran FWR, Manns MP, Steinmann E, Hahn T von, Ciesek S.  
693 2016. Host cell mTORC1 is required for HCV RNA replication. *Gut* 65:2017–2028.  
694 doi:10.1136/gutjnl-2014-308971.
- 695 36. Johri MK, Lashkari HV, Gupta D, Vedagiri D, Harshan KH. 2020. mTORC1 restricts  
696 hepatitis C virus RNA replication through ULK1-mediated suppression of miR-122  
697 and facilitates post-replication events. *J Gen Virol* 101:86–95.  
698 doi:10.1099/jgv.0.001356.
- 699 37. Levy G, Habib N, Guzzardi MA, Kitsberg D, Bomze D, Ezra E, Uygun BE, Uygun K,  
700 Trippler M, Schlaak JF, Shibolet O, Sklan EH, Cohen M, Timm J, Friedman N,

- 701 Nahmias Y. 2016. Nuclear receptors control pro-viral and antiviral metabolic  
702 responses to hepatitis C virus infection. *Nat Chem Biol* 12:1037–1045.  
703 doi:10.1038/nchembio.2193.
- 704 38. Brown RJP, Tegtmeyer B, Sheldon J, Khera T, Anggakusuma, Todt D, Vieyres G,  
705 Weller R, Joecks S, Zhang Y, Sake S, Bankwitz D, Welsch K, Ginkel C, Engelmann  
706 M, Gerold G, Steinmann E, Yuan Q, Ott M, Vondran FWR, Krey T, Ströh LJ, Miskey  
707 C, Ivics Z, Herder V, Baumgärtner W, Lauber C, Seifert M, Tarr AW, McClure CP,  
708 Randall G, Baktash Y, Ploss A, Thi VLD, Michailidis E, Saeed M, Verhoye L,  
709 Meuleman P, Goedecke N, Wirth D, Rice CM, Pietschmann T. 2020. Liver-  
710 expressed Cd302 and Cr11 limit hepatitis C virus cross-species transmission to  
711 mice. *Sci Adv* 6. doi:10.1126/sciadv.abd3233.
- 712 39. Pfaender S, Brown RJ, Pietschmann T, Steinmann E. 2014. Natural reservoirs for  
713 homologs of hepatitis C virus. *Emerg Microbes Infect* 3:e21.  
714 doi:10.1038/emi.2014.19.
- 715 40. Pietschmann T, Kaul A, Koutsoudakis G, Shavinskaya A, Kallis S, Steinmann E,  
716 Abid K, Negro F, Dreux M, Cosset FL, Bartenschlager R. 2006. Construction and  
717 characterization of infectious intragenotypic and intergenotypic hepatitis C virus  
718 chimeras. *Proc Natl Acad Sci U S A* 103:7408–7413.  
719 doi:10.1073/pnas.0504877103.
- 720 41. Haid S, Windisch MP, Bartenschlager R, Pietschmann T. 2010. Mouse-specific  
721 residues of claudin-1 limit hepatitis C virus genotype 2a infection in a human  
722 hepatocyte cell line. *J Virol* 84:964–975. doi:10.1128/JVI.01504-09.
- 723 42. Vieyres G, Pietschmann T. 2013. Entry and replication of recombinant hepatitis C  
724 viruses in cell culture. *Methods* 59:233–248. doi:10.1016/j.ymeth.2012.09.005.
- 725 43. Livak KJ, Schmittgen TD. 2001. Analysis of relative gene expression data using  
726 real-time quantitative PCR and the 2(-Delta Delta C(T)) Method. *Methods* 25:402–  
727 408. doi:10.1006/meth.2001.1262.
- 728 44. Baruzzo G, Hayer KE, Kim EJ, Di Camillo B, FitzGerald GA, Grant GR. 2016.  
729 Simulation-based comprehensive benchmarking of RNA-seq aligners. *Nature*  
730 *Methods* 14:135–139. doi:10.1038/nmeth.4106.
- 731 45. Mortazavi A, Williams BA, McCue K, Schaeffer L, Wold B. 2008. Mapping and  
732 quantifying mammalian transcriptomes by RNA-Seq. *Nat Methods* 5:621–628.  
733 doi:10.1038/nmeth.1226.
- 734 46. Supek F, Bošnjak M, Škunca N, Šmuc T. 2011. REVIGO summarizes and visualizes  
735 long lists of gene ontology terms. *PLoS One* 6:e21800.
- 736 47. Kramer A, Green J, Pollard, J., Jr., Tugendreich S. 2014. Causal analysis  
737 approaches in Ingenuity Pathway Analysis. *Bioinformatics* 30:523–530.  
738 doi:10.1093/bioinformatics/btt703.  
739

## 740 **FIGURE LEGENDS**

741

### 742 **Figure 1: Experimental protocol and RNA-seq data validation**

743 **(A)** Schematic of experimental protocol. PHH: primary human hepatocytes. RNA-seq:  
744 RNA sequencing. **(B)** Visualization of global transcriptional changes induced by HCV  
745 infection (n=7 donors) or treatment with UV-inactivated HCV (HCV<sup>UV</sup>, n=4 donors). For  
746 individual plots, average RPKM (log<sub>10</sub>) values for all detected transcripts from  
747 conditioned medium (CM) treated cells are plotted on the x-axis, with corresponding  
748 values from HCV-infected and HCV<sup>UV</sup> treated cells plotted on the y-axis, respectively.  
749 Pearson's r and p-values for each comparison are inset. hpi: hours post infection. **(C)**  
750 Three dimensional principal component analysis (PCA) from PHH donor 4. Samples are  
751 distinguishable depending on their time point and infection status. **(D)** Control gene  
752 expression levels in PHHs and Huh-7-5 cells at 6 and 72 hpi. Heat maps of control gene  
753 RPKM values (log<sub>10</sub>) from individual PHH donors or different Huh-7.5 cell passages.  
754 IRGs: Interferon regulated genes.

755

### 756 **Figure 2: Intact innate immunity suppresses HCV propagation in PHHs**

757 **(A)** Comparative gene induction of four control genes measured by RT-qPCR or RNA-  
758 seq (n=4 donors). Top panel shows fold gene induction determined by RT-qPCR and  
759 calculated by the  $2^{-\Delta\Delta CT}$  method (43) compared to CM treated PHHs. Bottom panel  
760 shows fold gene induction based on RNA-seq data for the same samples under identical  
761 conditions. **(B)** Intracellular HCV-RNA copies in HCV infected PHHs (n=4 donors, top)  
762 and Huh-7.5 cells (n=3, bottom). Bars represent HCV RNA GE (genome equivalents)  
763 per 1µg total RNA. \*: p-value < 0.05. ns: not significant. Data was log-transformed and a  
764 one-tailed, unpaired t-test applied to each comparison. **(C)** Secretion of infectious virions  
765 in supernatants of HCV infected PHHs (top) and Huh-7.5 cells (bottom). Numbers of  
766 infectious particles in PHH supernatants at 72 hpi were under the LOQ of the assay at a  
767 1:3 dilution. Dashed line indicates a separate experiment with four additional PHH  
768 donors preincubated with 10µM ruxolitinib (Rux), a JAK/STAT inhibitor, prior to and  
769 directly after HCV infection. **(D-E)** Immunofluorescence staining of viral NS5A protein in  
770 PHH **(D)** or Huh-7.5 cells. **(E)** PHH were treated with CM or infected with HCV for 72  
771 hours with or without ruxolitinib pretreatment. NS5A staining is shown in red with nuclear  
772 counterstaining (DAPI) in blue.

773

### 774 **Figure 3: HCV infection induces temporally structured and functionally diverse** 775 **gene programs in PHHs**

776 **(A)** Comparison of numbers of HCV and HCV<sup>UV</sup> induced DEGs (left) and enriched GO  
777 categories (right) at 6 and 72 hpi. **(B)** Genomic location of HCV-induced transcripts.  
778 Manhattan plots compare transcript abundance in uninfected versus HCV-infected PHHs  
779 at 6 hpi (top) and 72 hpi (bottom). Circles represent individual gene comparisons with  
780 sizes proportional to average RPKM fold-change (log<sub>2</sub>). **(C)** Number of HCV-induced  
781 genes in PHH at 6 and 72 hpi. Top Venn diagram shows overlap between DEGs at 6  
782 and 72 hpi, while gene overlap at 72 hpi with characterized IRGs\* (7) and IRG  
783 interactors\*\* (22) are displayed below. Only DEGs with FDR p-value <0.05 and RPKM  
784 >1 were included. **(D)** GO enrichment analysis of HCV-induced DEGs in PHHs. Each  
785 circle represents a GO category and is plotted depending on its p-value and size. Size

786 illustrates the frequency of the GO term in the underlying GO annotation (46).  
787 Representative GO categories are highlighted in graphs and their full annotation  
788 displayed below each plot. **(E)** HCV-induced transcripts at 72 hpi. Mean (n=7 donors)  
789 fold change ( $\log_2$ ) of HCV-induced DEGs associated with defense response to virus  
790 (top) or protein targeting to ER (bottom).  
791

792 **Figure 4: Distinct *IRF1*- and HCV-mediated transcriptional programs in Huh-7.5**  
793 **cells**

794 **(A)** Comparison of numbers DEGs (left) and enriched GO categories (right) upon HCV  
795 infection or ectopic *IRF1*-expression in Huh-7.5 cells. **(B)** Genomic location of HCV-  
796 induced (top) or *IRF1*-induced transcripts (bottom) in Huh-7.5 cells. Manhattan plots  
797 compare transcript abundance in uninfected Huh7-5 cells to HCV-infected or *IRF1*-  
798 expressing cells. Circles represent individual gene comparisons with sizes proportional  
799 to average RPKM fold-change ( $\log_2$ ). **(C)** HCV- and *IRF1*-induced DEGs show limited  
800 overlap. Top Venn diagram show overlap between HCV- and *IRF1*-induced DEGs while  
801 overlap of HCV-induced DEGs in Huh-7.5 versus PHHs is shown below. Only DEGs  
802 with FDR p-value <0.05 and RPKM >1 were included. **(D)** GO enrichment analyses of  
803 HCV- and *IRF1*-induced DEGs in Huh-7.5 cells. Each circle represents a GO category  
804 and is plotted depending on its p-value and size. Size illustrates the frequency of the GO  
805 term in the underlying GO annotation (46). Representative GO categories are highlighted  
806 in graphs and their full annotation displayed below each plot. **(E)** *IRF1*-induced  
807 transcripts in Huh-7.5. Mean fold change ( $\log_2$ ) of *IRF1*-induced DEGs associated with  
808 innate immune response (top) or regulation of intracellular signal transduction (bottom).  
809

810 **Figure 5: Ectopic *IRF1* expression induces an antiviral gene signature in Huh-7.5**  
811 **cells similar to baseline expression in PHHs**

812 **(A)** Baseline expression of IRGs and *IRF1*. Top panel. Basal IRG expression in Huh-7.5  
813 with and without *IRF1*-expression, compared to uninfected PHHs. Bottom panel.  
814 Comparison of baseline expression of *IRF1* and pattern recognition receptors (PRRs)  
815 that recognise double stranded (ds) RNA in Huh-7.5 cells and PHHs. **(B)** Area under the  
816 curve (AUC) analysis. Differences in *IRF1*-regulated gene expression levels for two  
817 distinct GO categories from Huh-7.5 [EMPTY] and Huh-7.5 [*IRF1*] cells, compared to  
818 expression in PHHs. Greater AUC values indicate more divergent expression profiles.  
819 **(C)** Correlation plots of *IRF1* regulated genes from the same two GO categories. RPKM  
820 values are plotted for individual genes, and simultaneous comparison of their expression  
821 in uninfected PHH to both Huh-7.5 [EMPTY] and Huh-7.5 [*IRF1*] cells is visualized.  
822 Pearson's r and p-values for each comparison are inset. **(D)** HCV-inducible *IRF1*-  
823 regulated genes in PHHs at 72 hpi. +: mean  $\log_2$  fold change in expression **(E)**  
824 Restriction of HCV replication and translation by ectopic *IRF1*-expression. Huh-7.5  
825 [EMPTY] and Huh-7.5 [*IRF1*] cells were electroporated with a subgenomic replicon of  
826 JFH-1. h.p.e.: hours post electroporation. \*\*\*\*: p-value < 0.0001. Data was log-  
827 transformed and multiple unpaired t-tests were performed comparing Huh-7.5 [EMPTY]  
828 vs. Huh-7.5 [IRF1] and Huh-7.5 [EMPTY] + DMSO vs. Huh-7.5 [EMPTY] + 2'CMA,  
829 respectively.  
830

831 **Figure 6: Upstream transcriptional regulators and canonical pathways**  
832 **dysregulated by HCV infection or ectopic *IRF1* expression**

833 **(A)** Upstream transcriptional regulators controlling DEGs. Ingenuity Pathway Analysis  
834 (IPA) calculated upstream regulators based on significant DEGs identified under the  
835 three presented conditions. Z-scores indicate activation or inhibition of individual  
836 regulators. Displayed are only the transcriptional regulators with a p-value <0.05 and a  
837 z-score above 2 or lower than -2. **(B)** Canonical pathway analyses of HCV- and *IRF1*-  
838 induced DEGs in PHHs and Huh-7.5 cells, respectively. Pathways are plotted with  
839 corresponding p-values (bars) and ratios between dysregulated molecules in our  
840 datasets and all molecules belonging to that pathway (linked black circles). The dotted  
841 line represents the significance threshold (p=0.05). The bar color represents the  
842 expression z-score. **(C)** Visualization of the top HCV-dysregulated pathway in PHHs at  
843 72 hpi (EIF2 Signaling) and its underlying DEGs. Left panel shows a modified cartoon of  
844 EIF2 Signaling as determined by IPA. Light blue coloring indicates significantly  
845 dysregulated molecules associated with the complex/molecule. Heatmap on the right  
846 displays fold change of significant DEGs involved in this pathway.

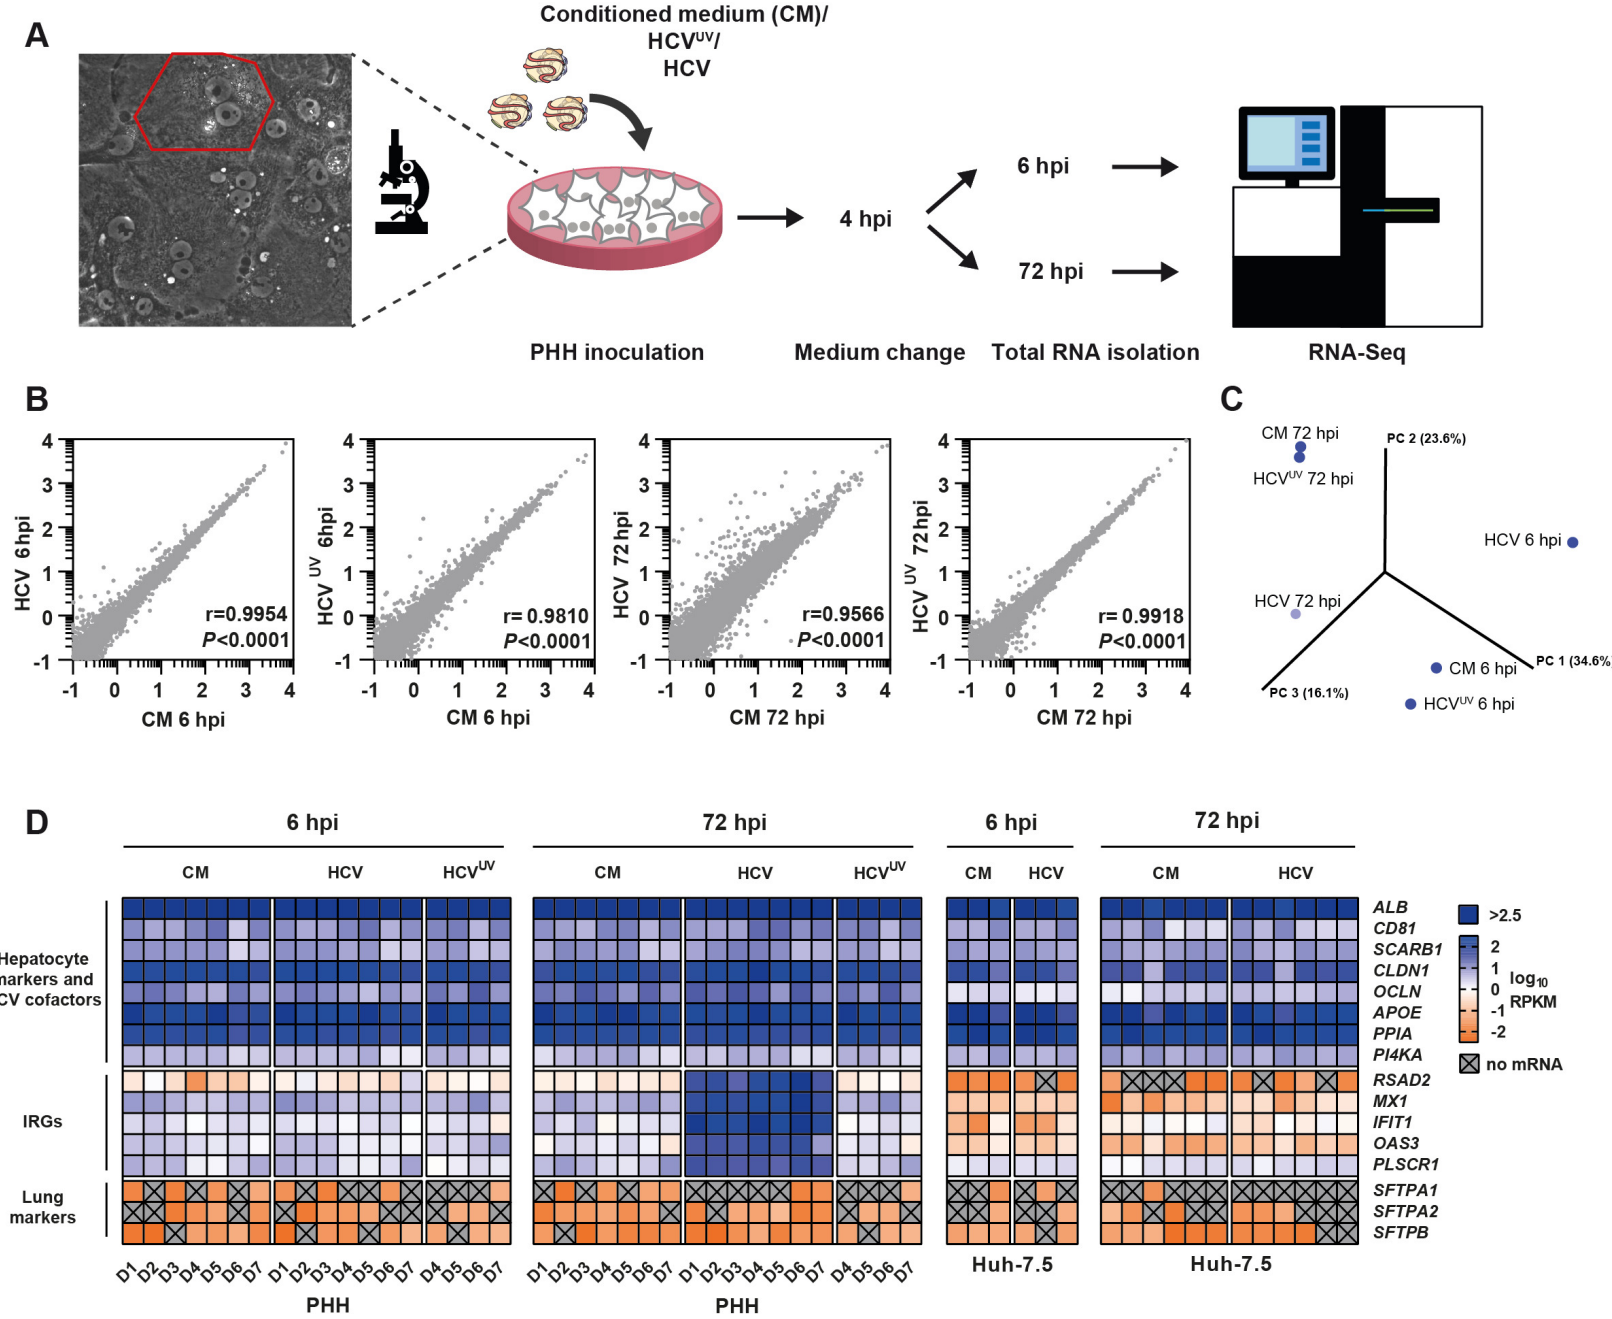



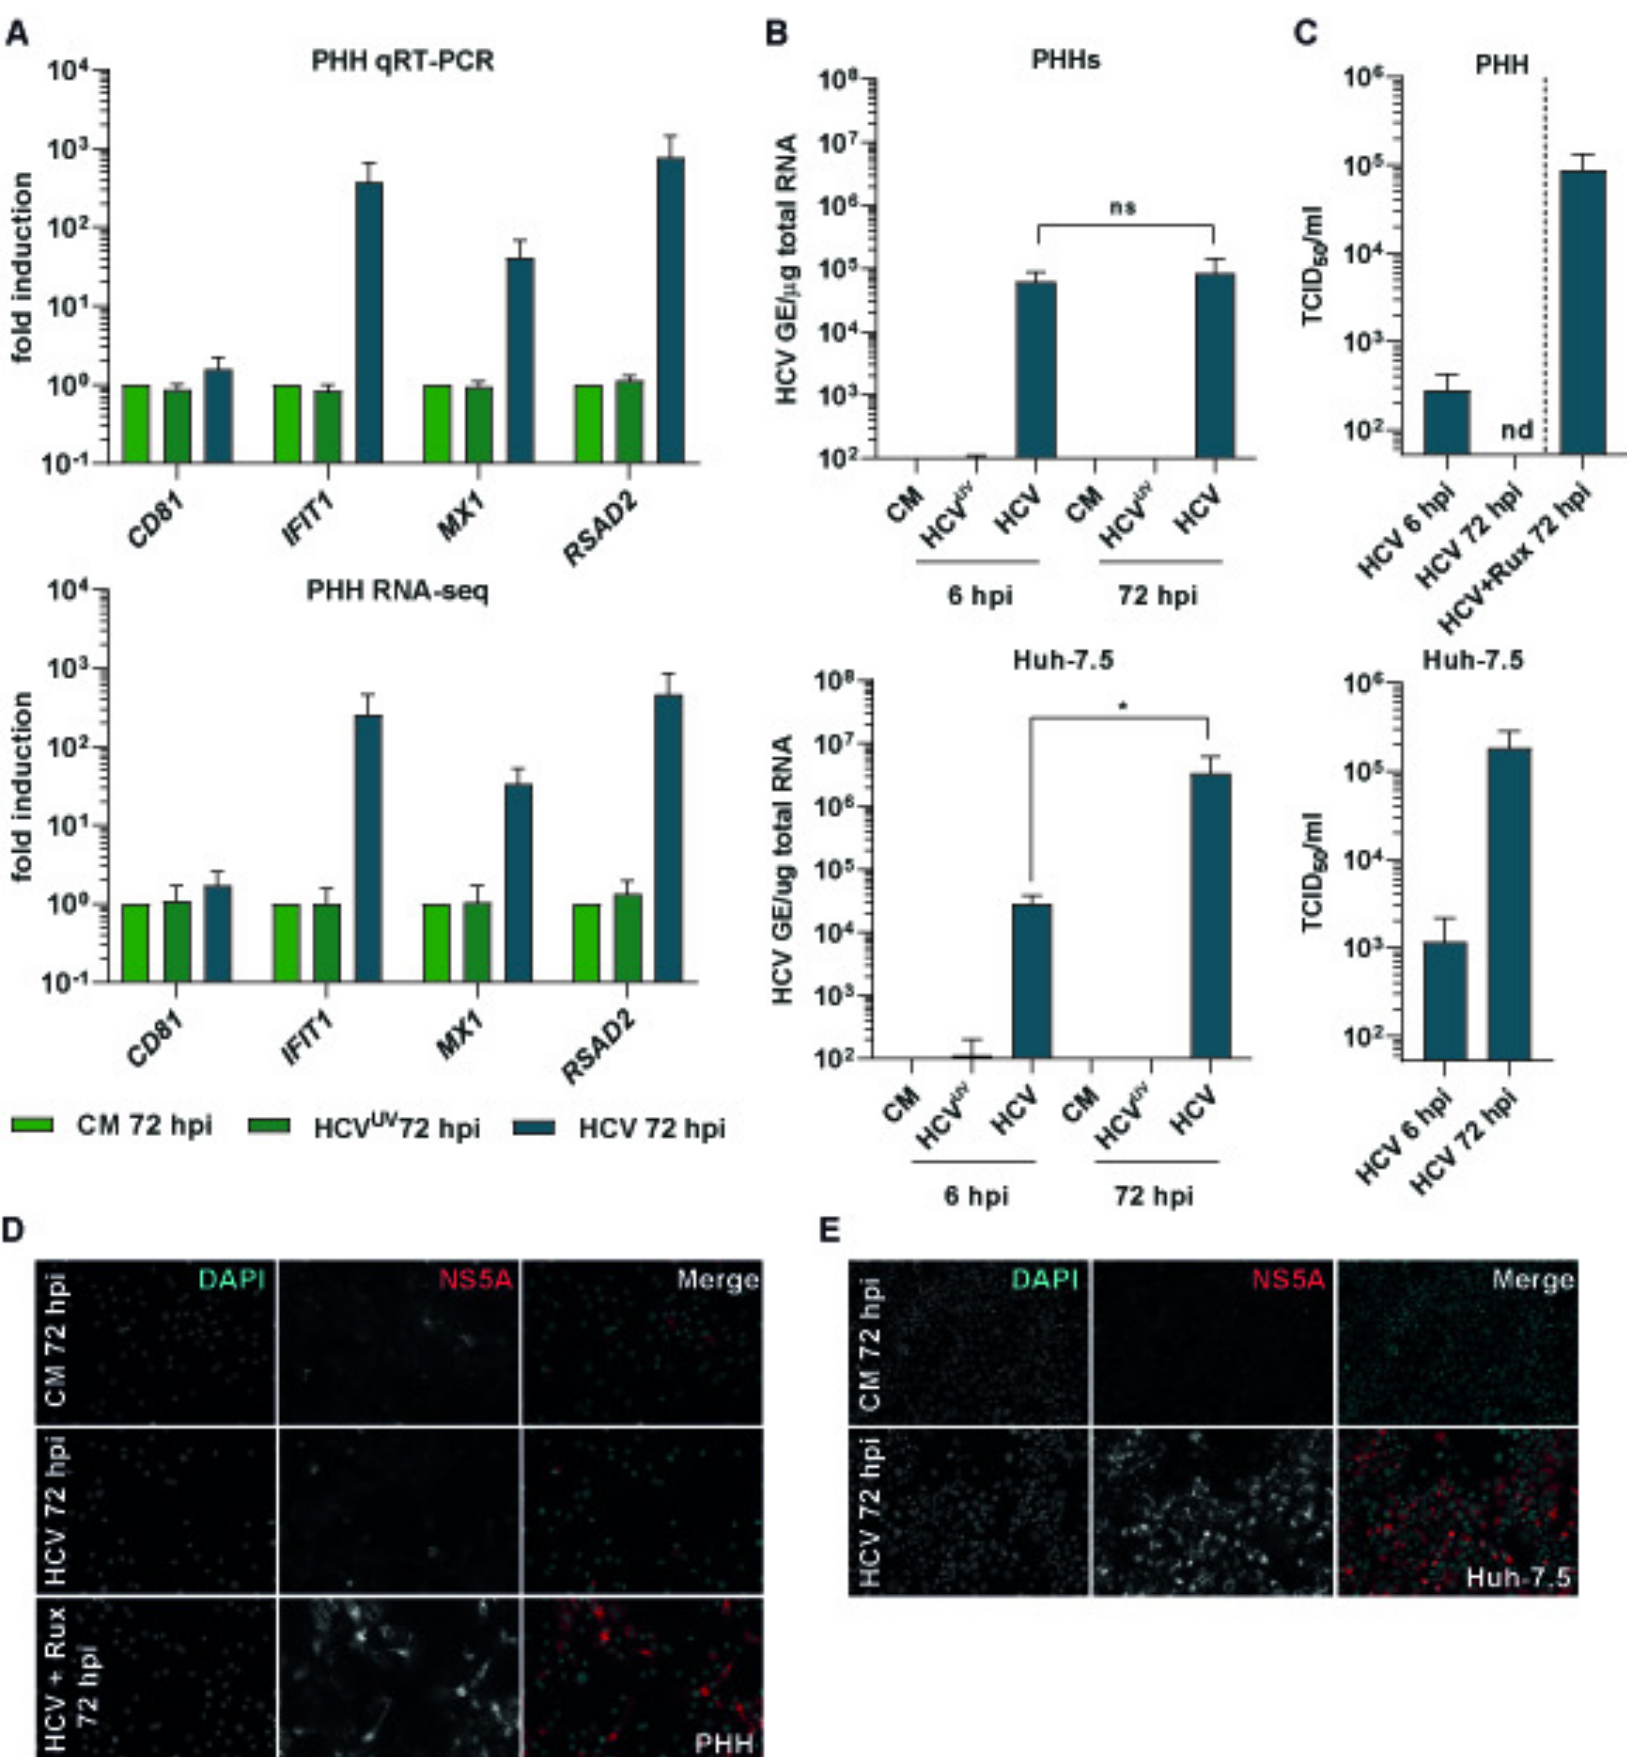

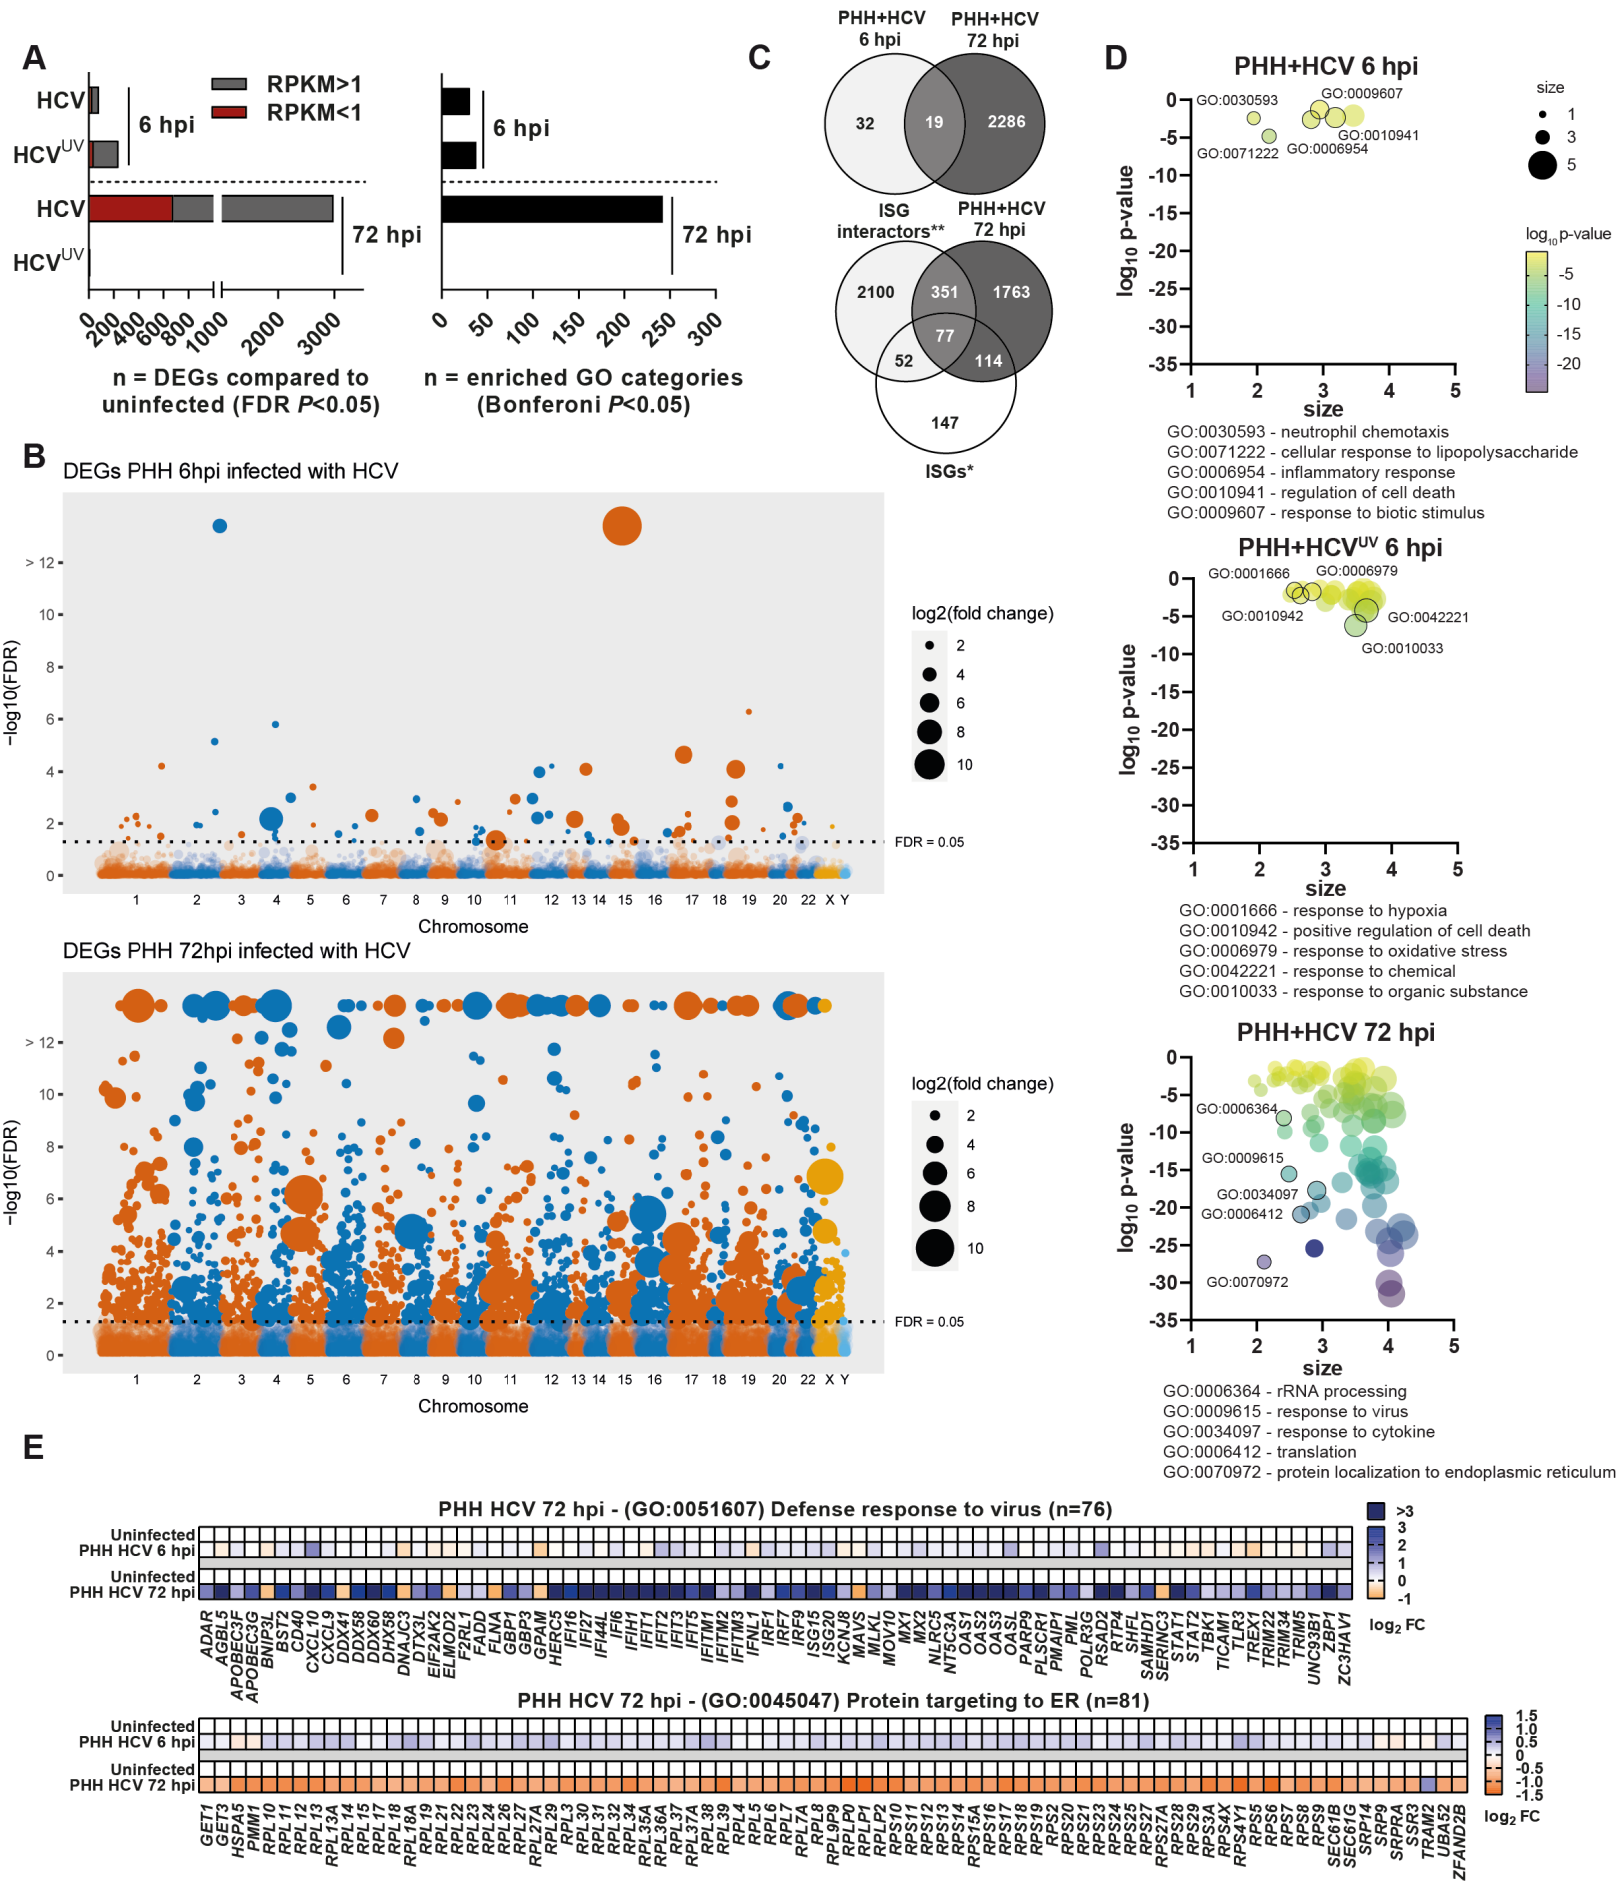

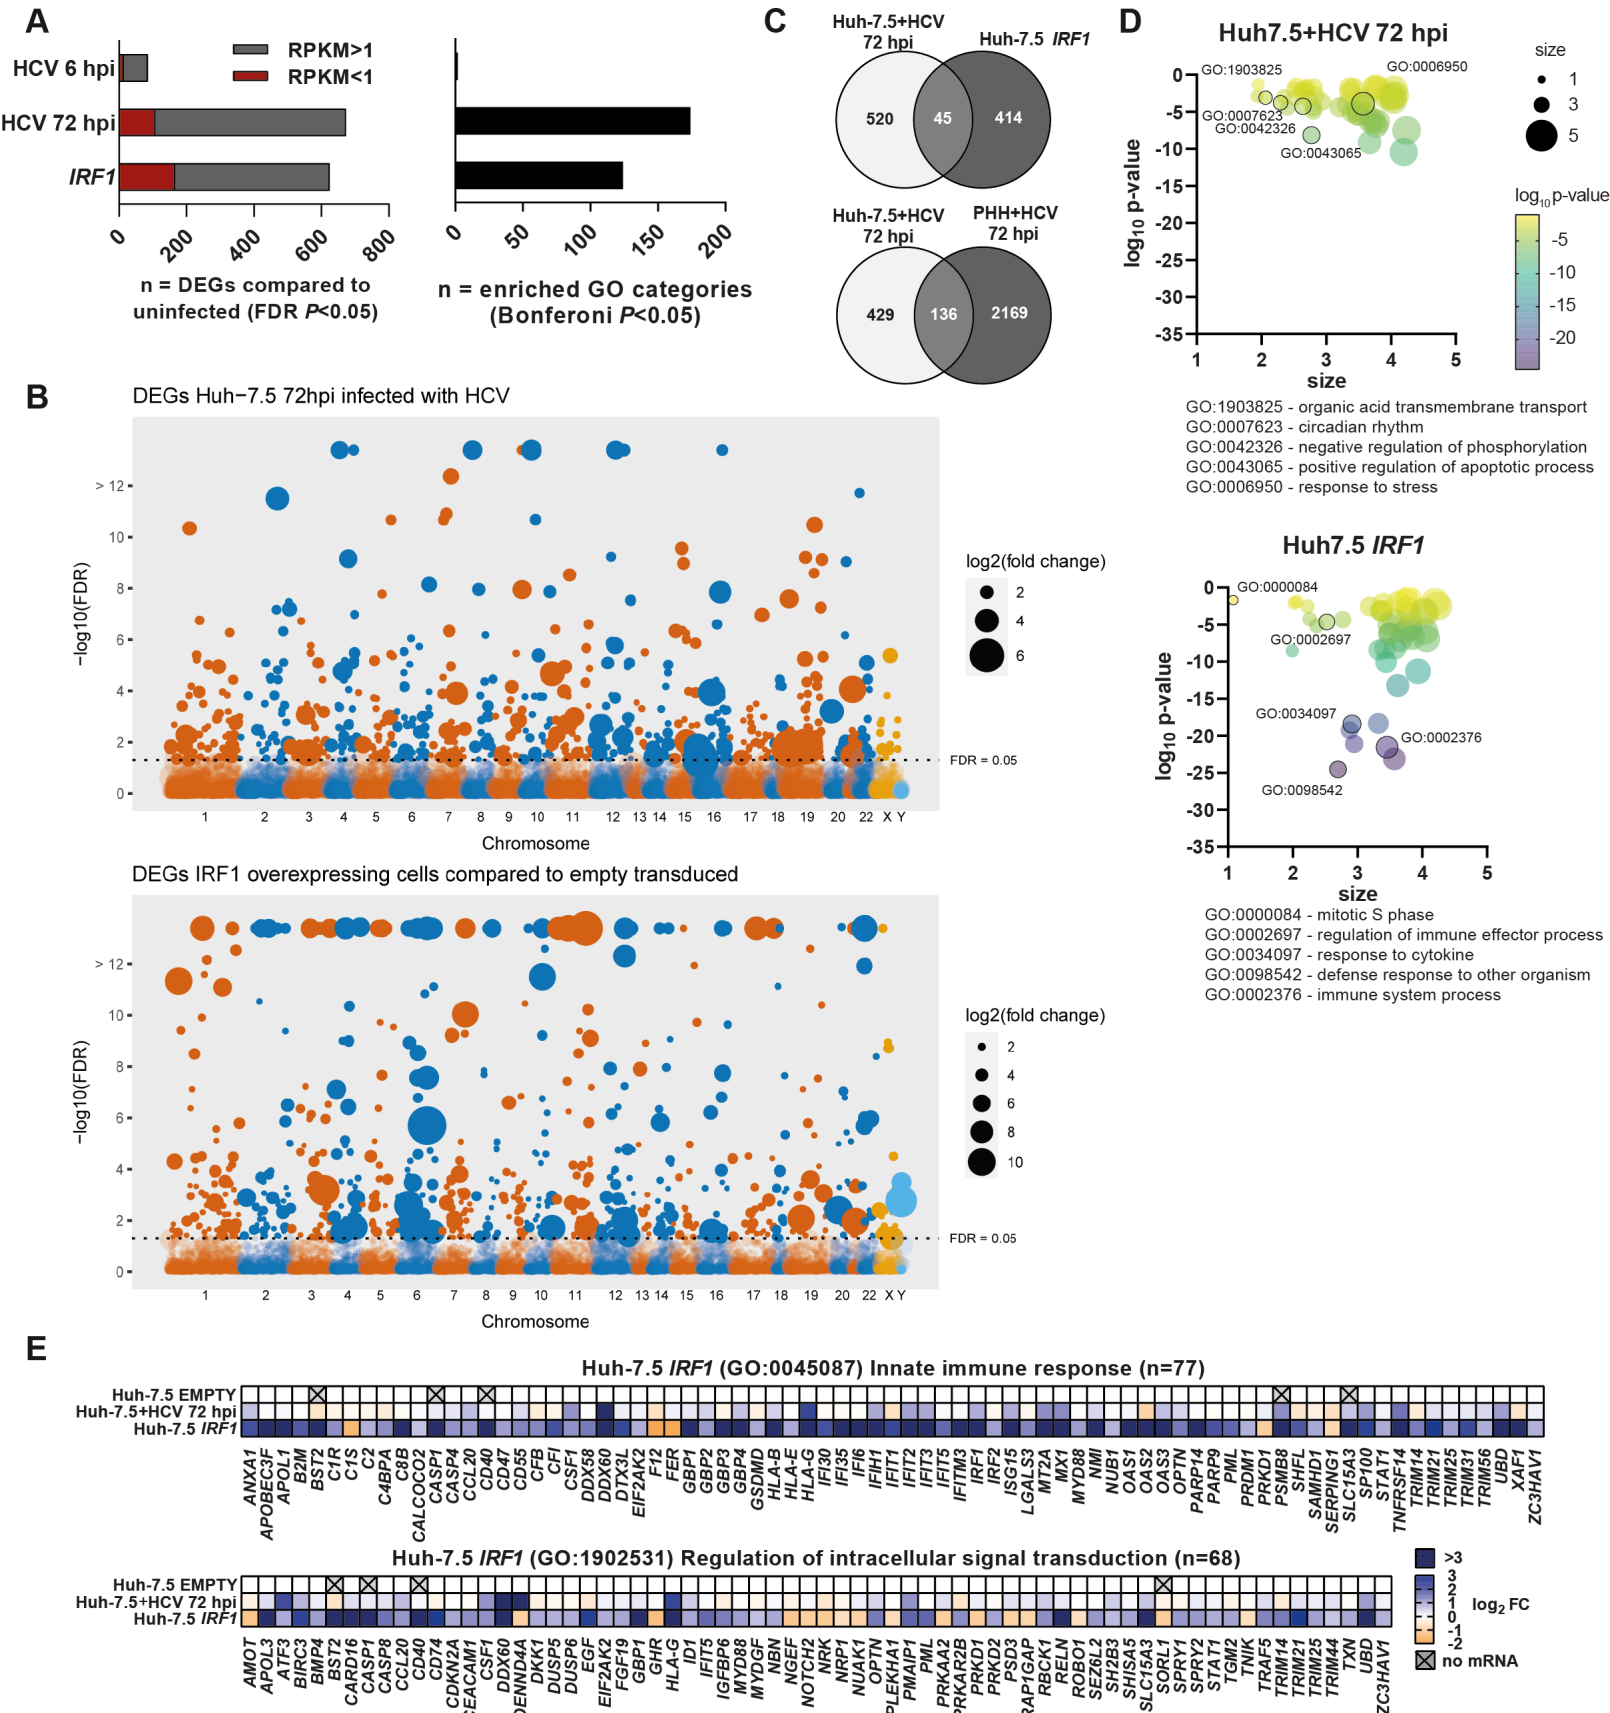

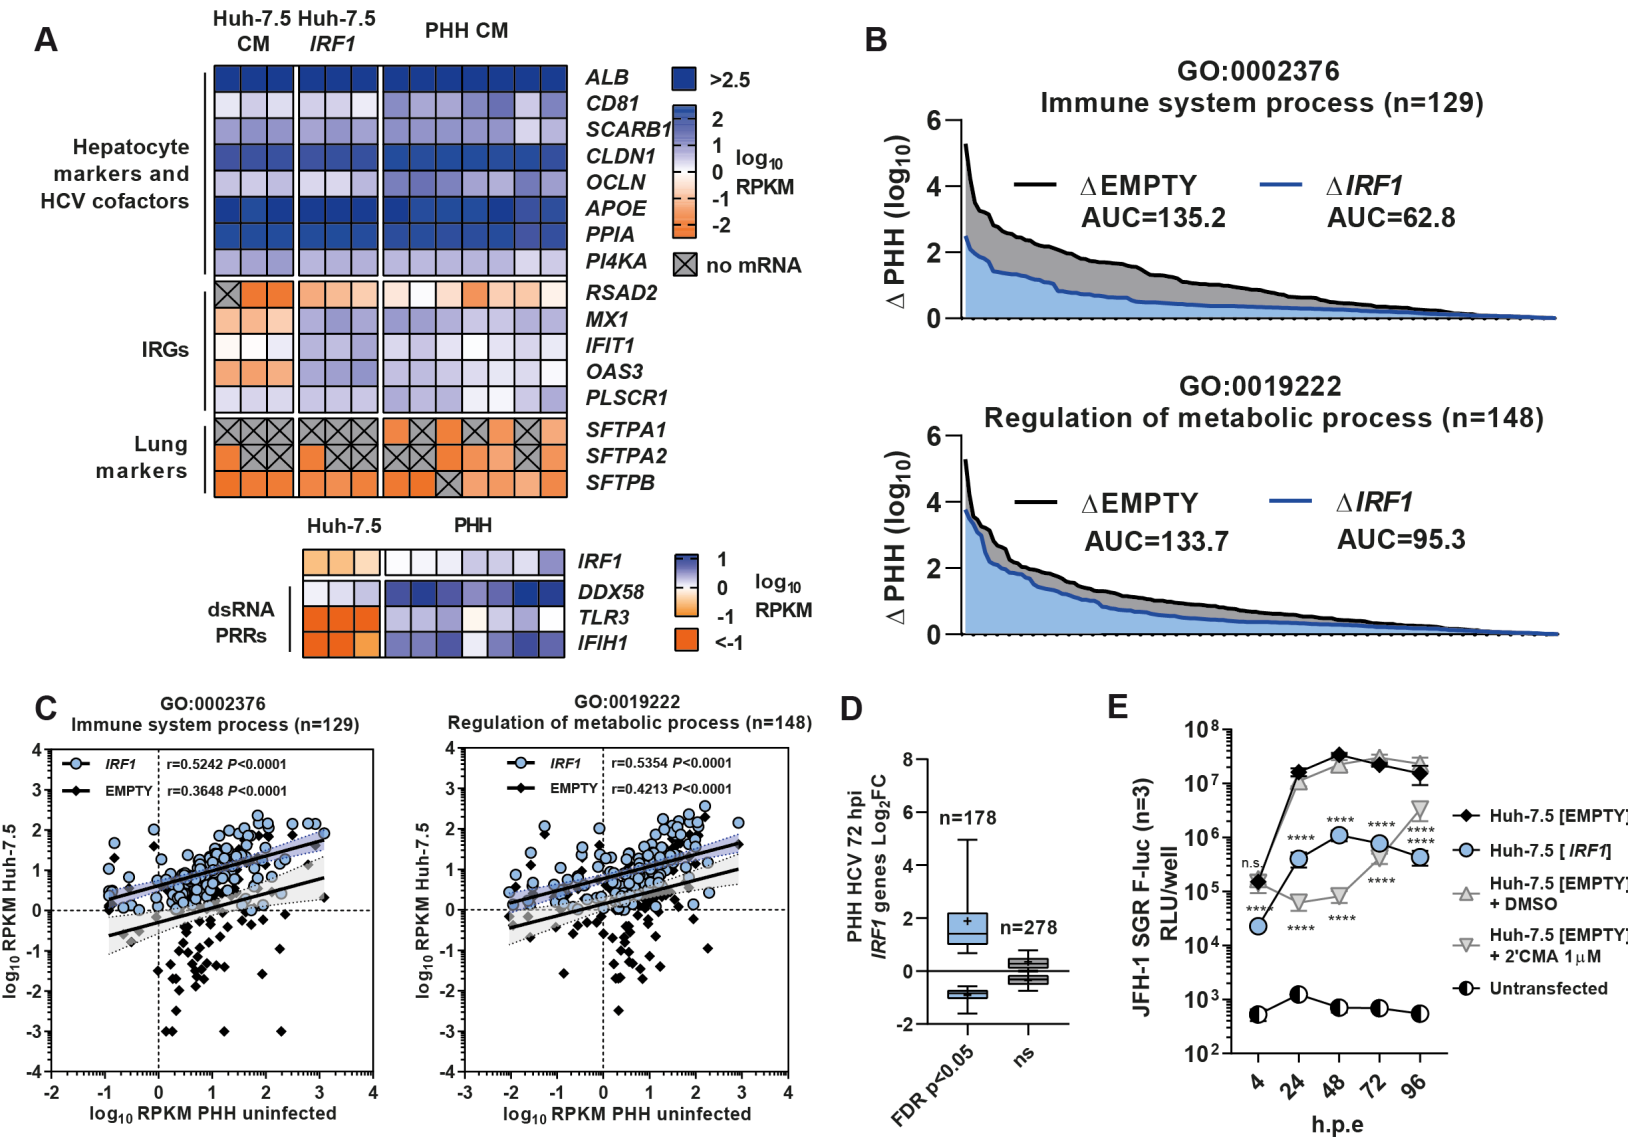

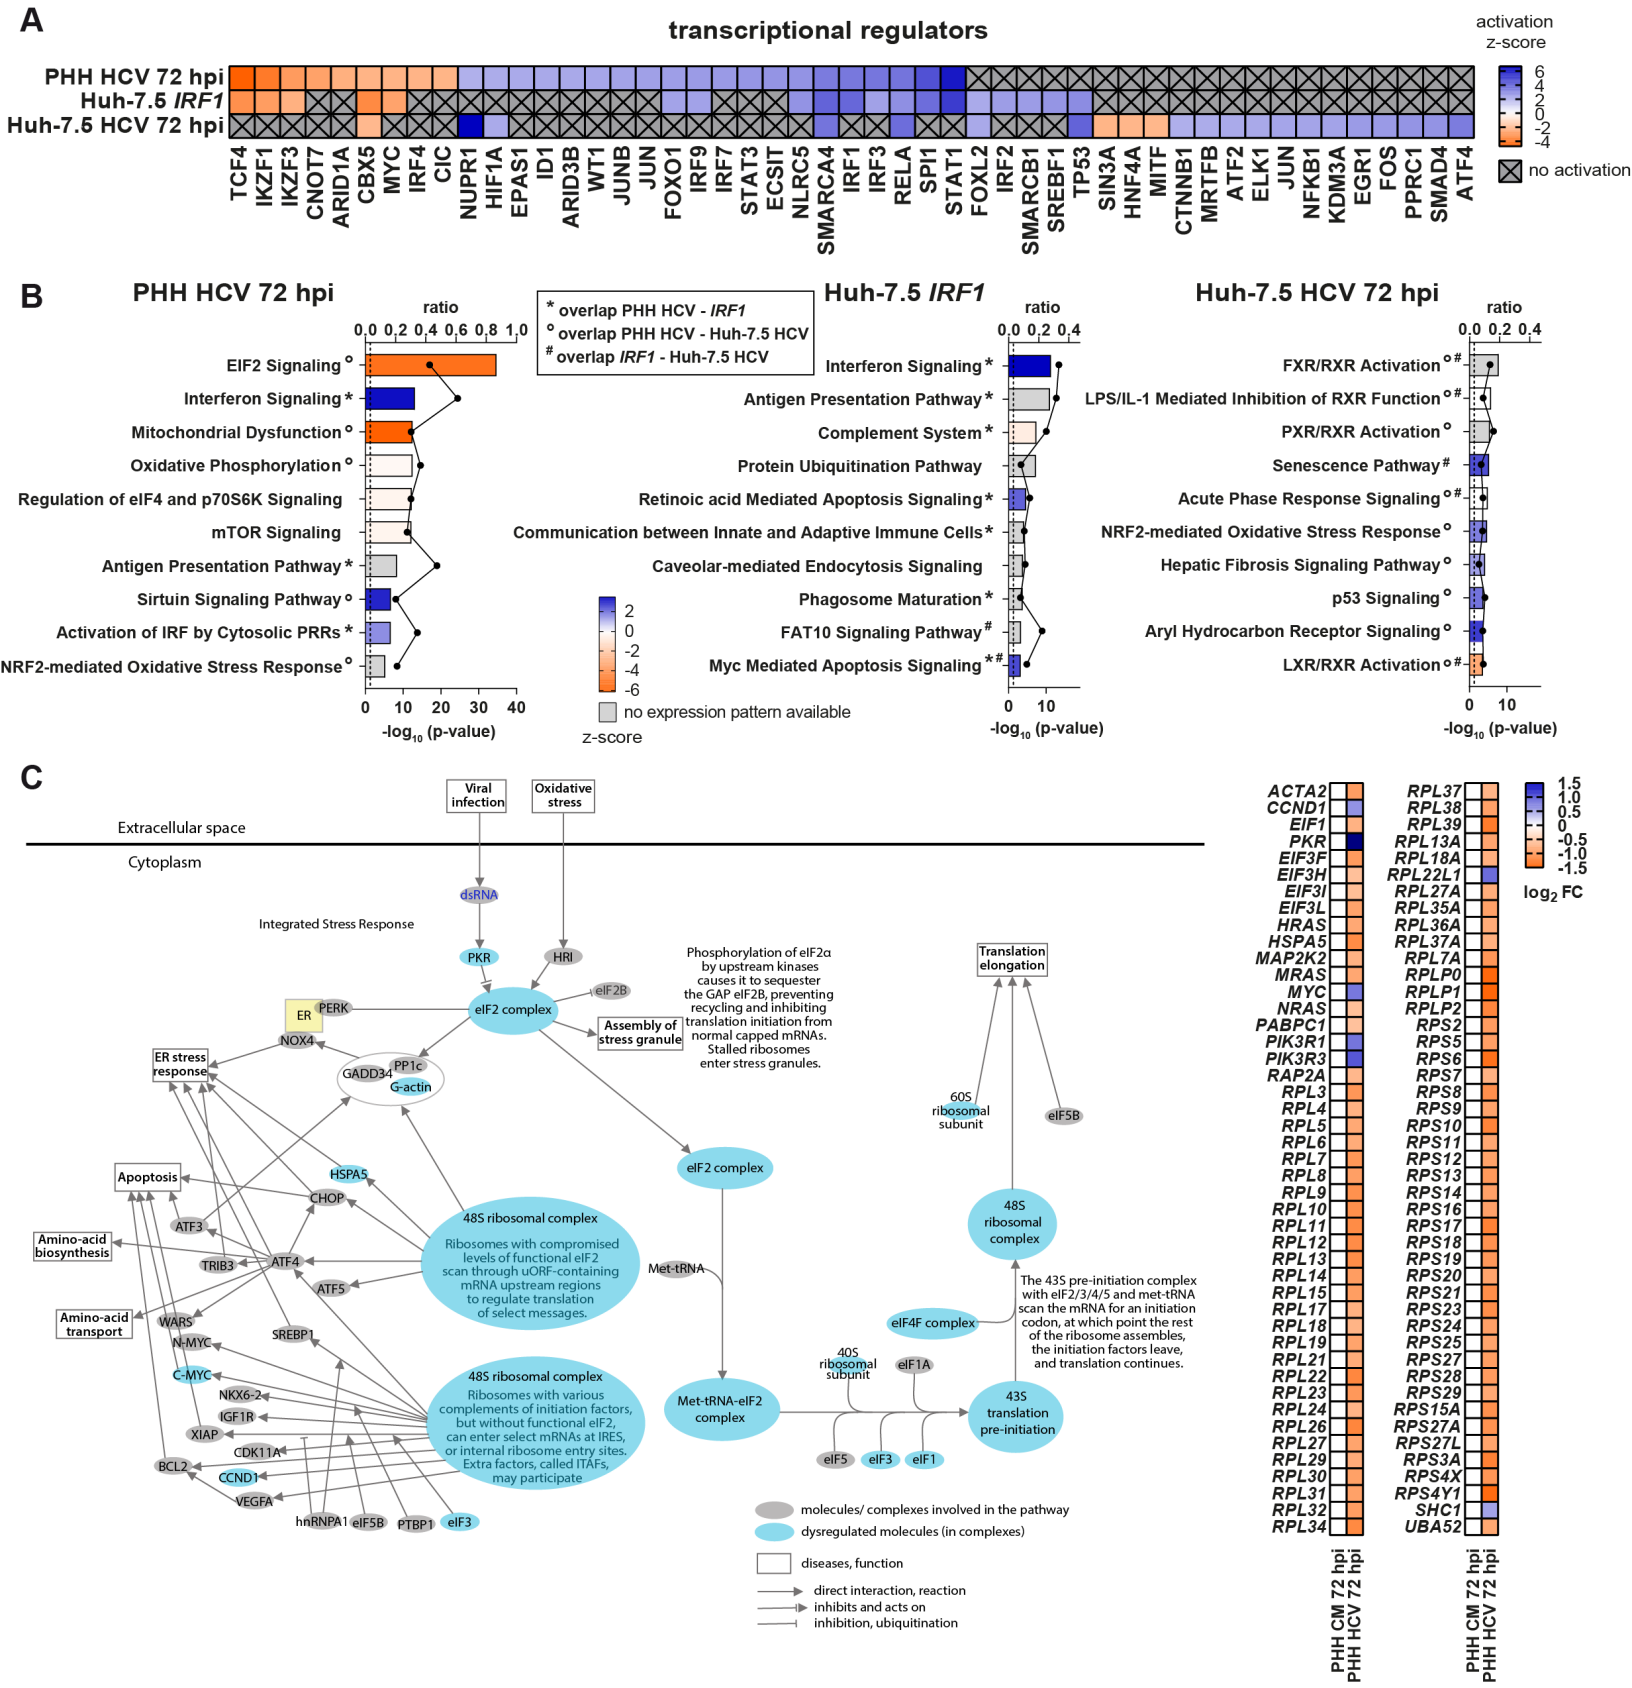

Source: https://biorxiv.org/content/10.1101/2021.02.12.431054v1.full.pdf
